# Supplementary material for: A BF3-mediated C–H/C–Li coupling of 1,3,7-triazapyrene with 2-thienyllithium in the design of push–pull fluorophores and chemosensors for nitroaromatics
Source: Royal Society of Chemistry journal article supplement (doi:10.1039/d1nj05216k), 2022-01-01
Supplement: d1nj05216k1.pdf [file d1nj05216k1.pdf]

# **BF<sub>3</sub>-mediated C-H/C-Li coupling of 1,3,7-triazapyrene with 2-thienyllithium in the design of push-pull fluorophores and chemosensors for nitroaromatics**

**Igor A. Lavrinchenko,<sup>a</sup> Timofey D. Moseev,<sup>a</sup> Mikhail V. Varaksin,<sup>a,b\*</sup>  
Grigoriy V. Zyryanov,<sup>a,b</sup> Olga S. Taniya,<sup>a</sup> Anton N. Tsmokalyuk,<sup>a</sup>  
Oleg P. Demidov,<sup>c</sup> Ivan V. Borovlev,<sup>c</sup> Valery N. Charushin,<sup>a,b</sup> Oleg N. Chupakhin,<sup>a,b\*</sup>**

<sup>a</sup> *Ural Federal University, 19 Mira Str., 620002 Ekaterinburg, Russia*

<sup>b</sup> *Institute of Organic Synthesis, Ural Branch of the Russian Academy of Sciences, 22 S.  
Kovalevskaya Str., 620990 Ekaterinburg, Russia*

<sup>c</sup> *North Caucasus Federal University, 355009, Stavropol, Russia*

*E-mail: [m.v.varaksin@urfu.ru](mailto:m.v.varaksin@urfu.ru)*

*E-mail: [chupakhin@ios.uran.ru](mailto:chupakhin@ios.uran.ru)*

## **Table of contents**

|                                                                        |            |
|------------------------------------------------------------------------|------------|
| <b>1. Copies of the NMR spectra.....</b>                               | <b>S2</b>  |
| <b>2. Optical studies .....</b>                                        | <b>S5</b>  |
| <b>2.1. Absorbance spectra of compound 3a,b.....</b>                   | <b>S5</b>  |
| <b>2.2. Lippert-Mataga plot of compound 3a,b .....</b>                 | <b>S6</b>  |
| <b>2.3. Lifetime measurement .....</b>                                 | <b>S7</b>  |
| <b>3. Nitroaromatics detection spectra .....</b>                       | <b>S8</b>  |
| <b>3.1. Absorption spectra of nitroaromatics.....</b>                  | <b>S8</b>  |
| <b>3.2. Stern-Volmer calculations .....</b>                            | <b>S8</b>  |
| <b>3.3. Quenching mechanism.....</b>                                   | <b>S9</b>  |
| <b>3.4. Perrin calculation .....</b>                                   | <b>S10</b> |
| <b>3.5. Stern-Volmer, Perrin, and LOD graphs for compound 3a .....</b> | <b>S10</b> |
| <b>4. DFT calculations.....</b>                                        | <b>S25</b> |
| <b>5. Molecular orbitals images .....</b>                              | <b>S27</b> |
| <b>6. The molecular electronic potential diagrams .....</b>            | <b>S30</b> |
| <b>References .....</b>                                                | <b>S32</b> |

## 1. Copies of the NMR spectra

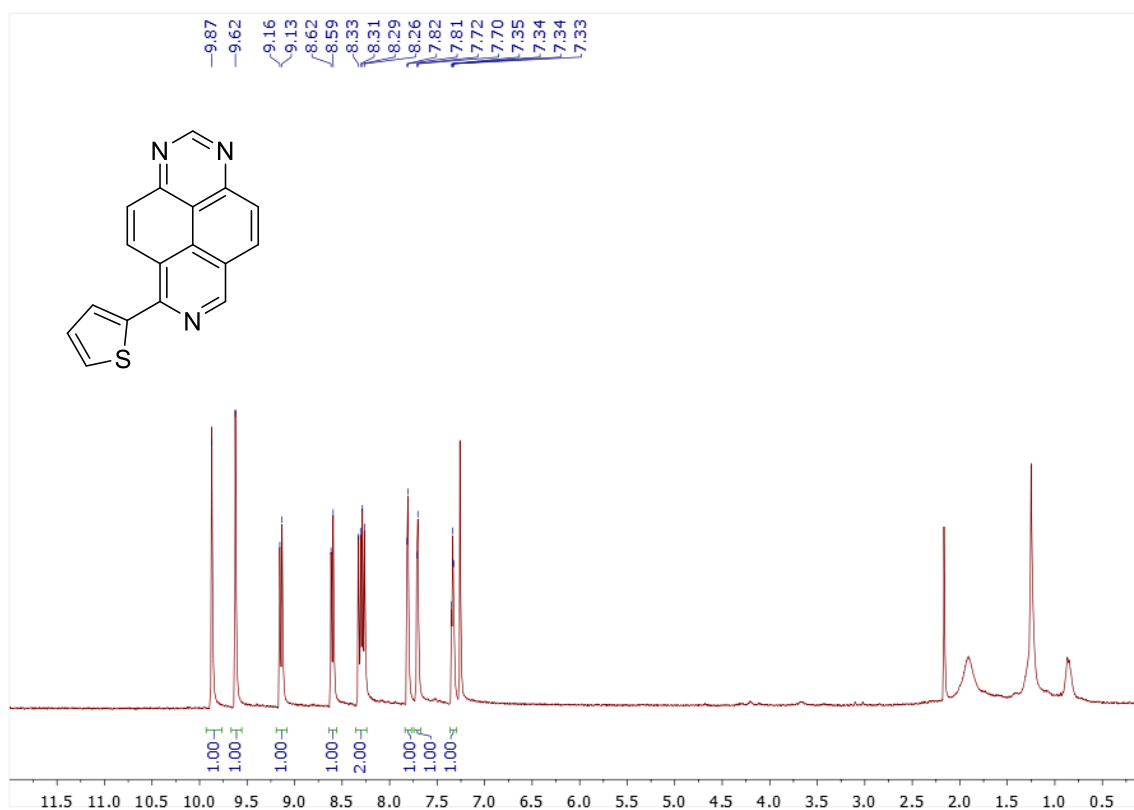

Figure S1. <sup>1</sup>H NMR spectrum of compound **3a** in DCCl<sub>3</sub> (400 MHz) at 298 K

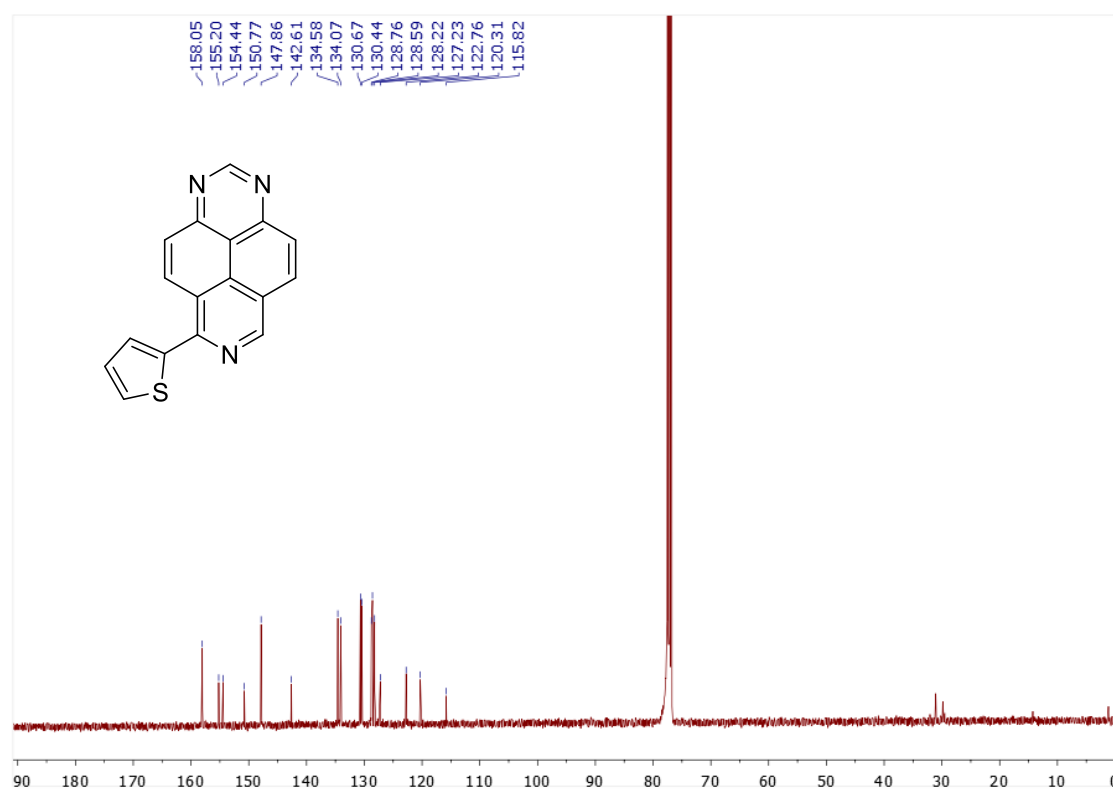

Figure S2. <sup>13</sup>C NMR spectrum of compound **3a** in DCCl<sub>3</sub> (101 MHz) at 298 K

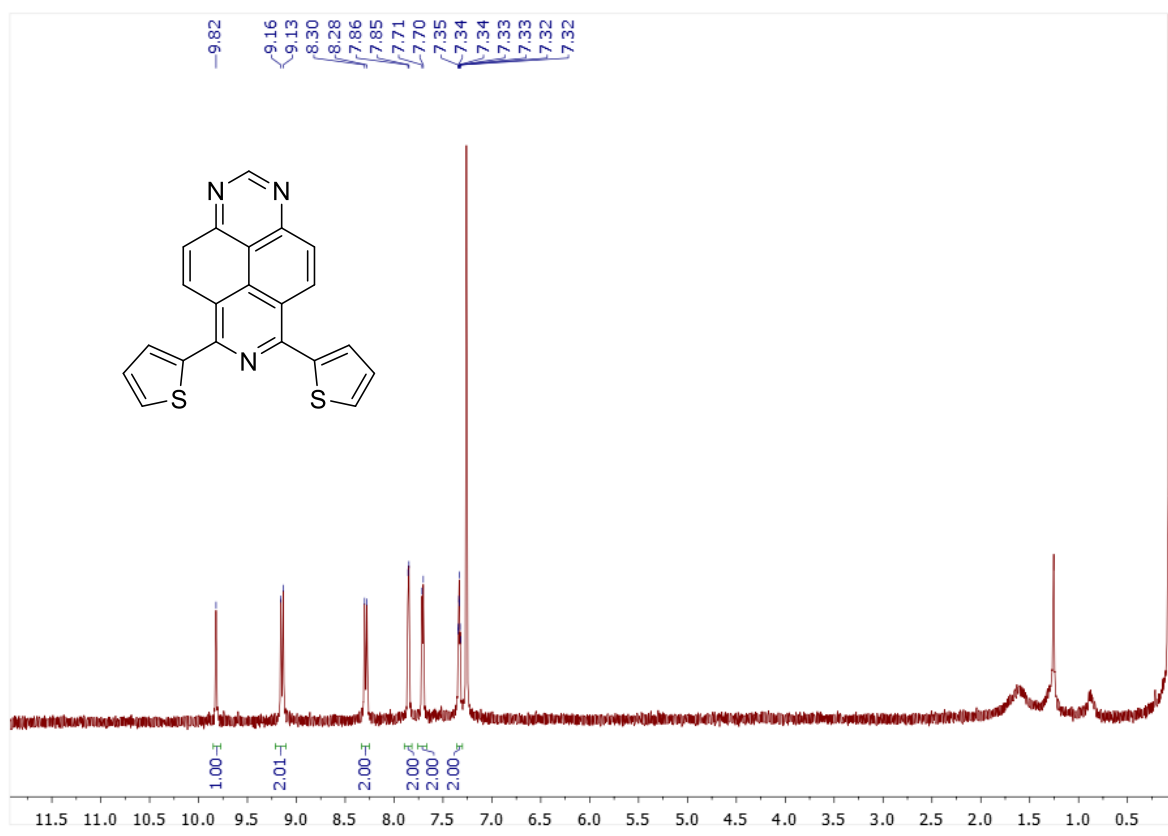

Figure S3.  $^1\text{H}$  NMR spectrum of compound **3b** in  $\text{DCCl}_3$  (400 MHz) at 298 K

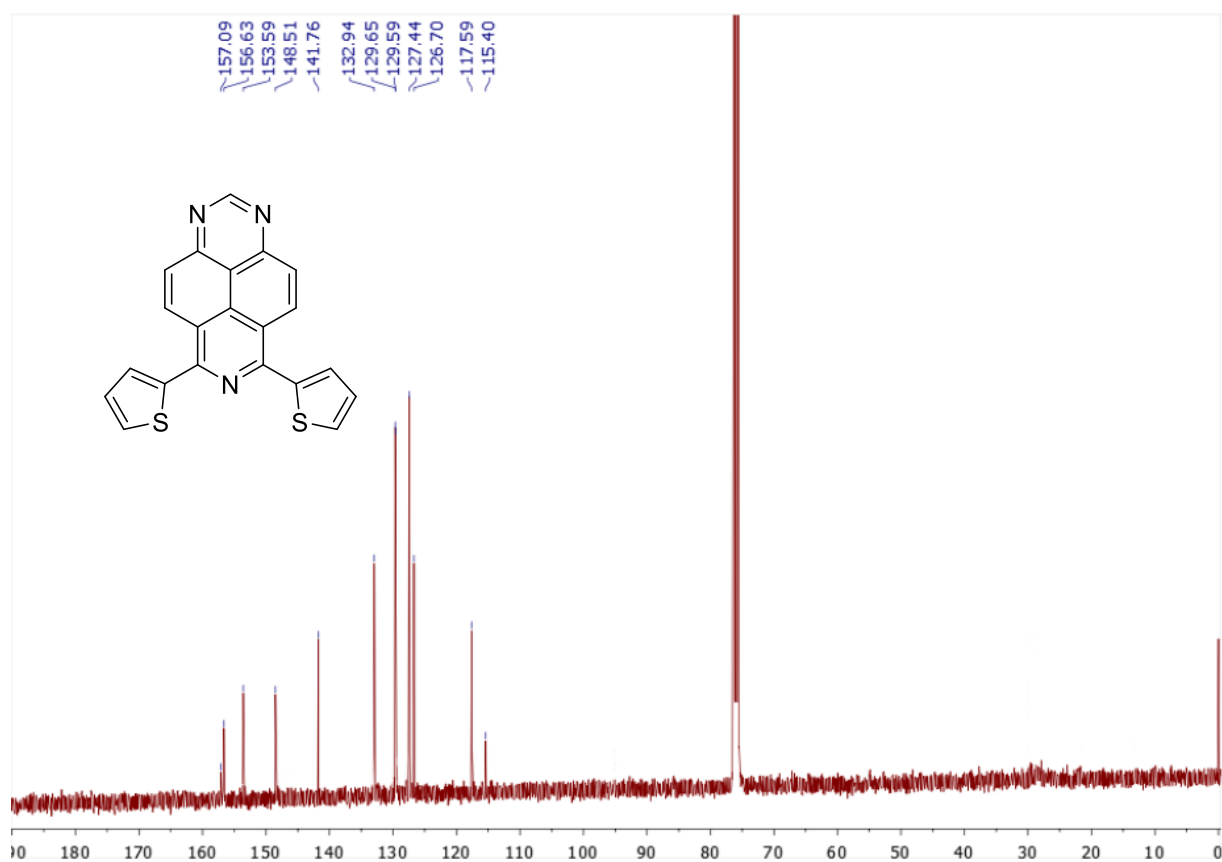

Figure S4.  $^{13}\text{C}$  NMR spectrum of compound **3b** in  $\text{DCCl}_3$  (101 MHz) at 298 K

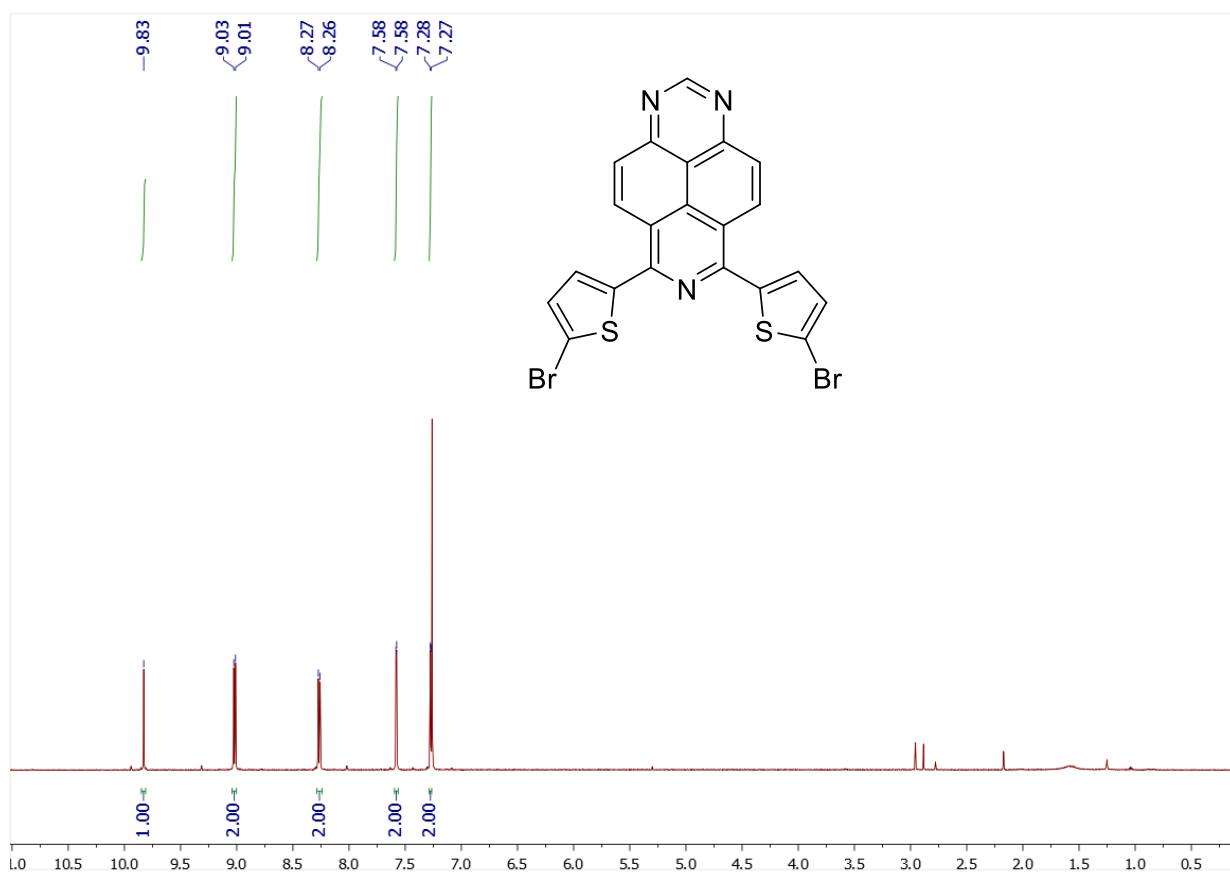

Figure S5.  $^1\text{H}$  NMR spectrum of compound **4** in  $\text{DCCl}_3$  (600 MHz) at 298 K

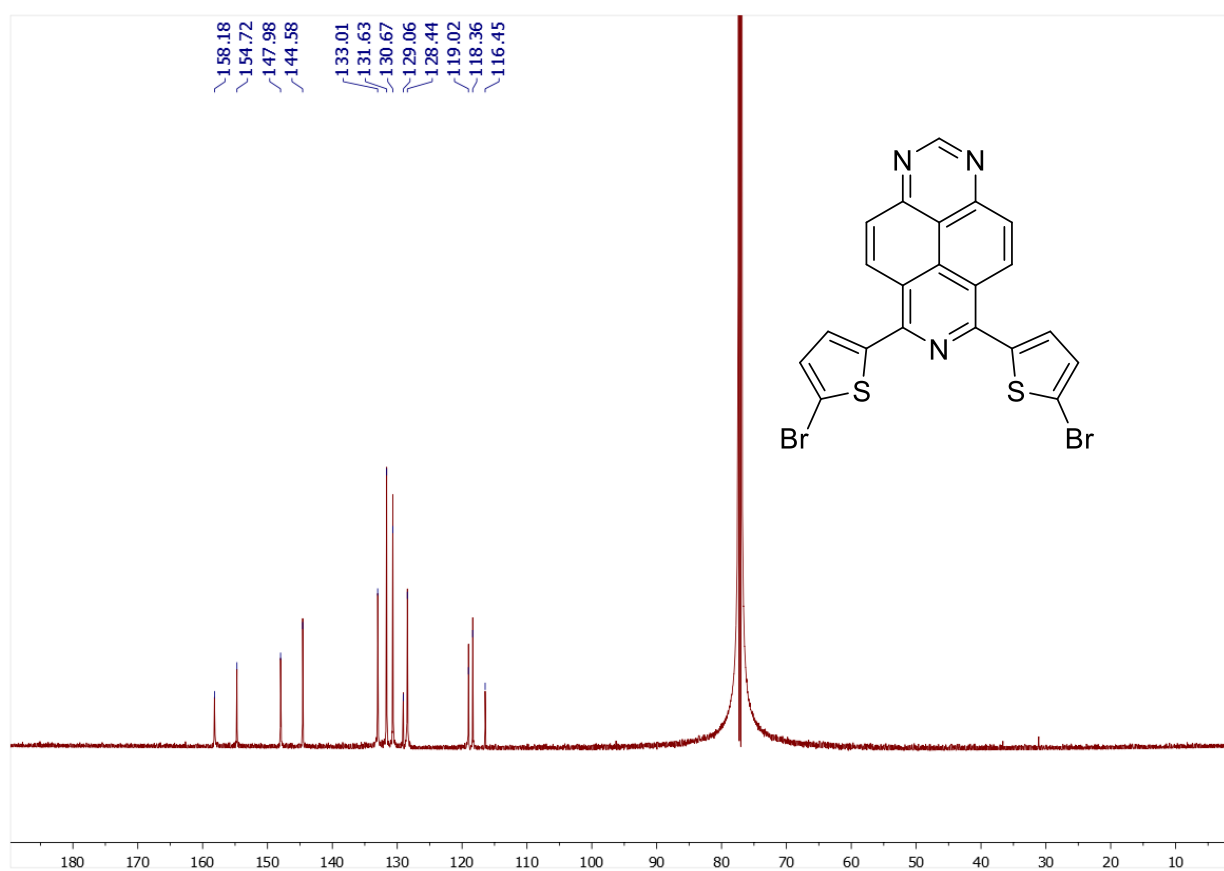

Figure S6.  $^{13}\text{C}$  NMR spectrum of compound **4** in  $\text{DCCl}_3$  (151 MHz) at 298 K

## 2. Optical studies

### 2.1. Absorbance spectra of compound 3a,b

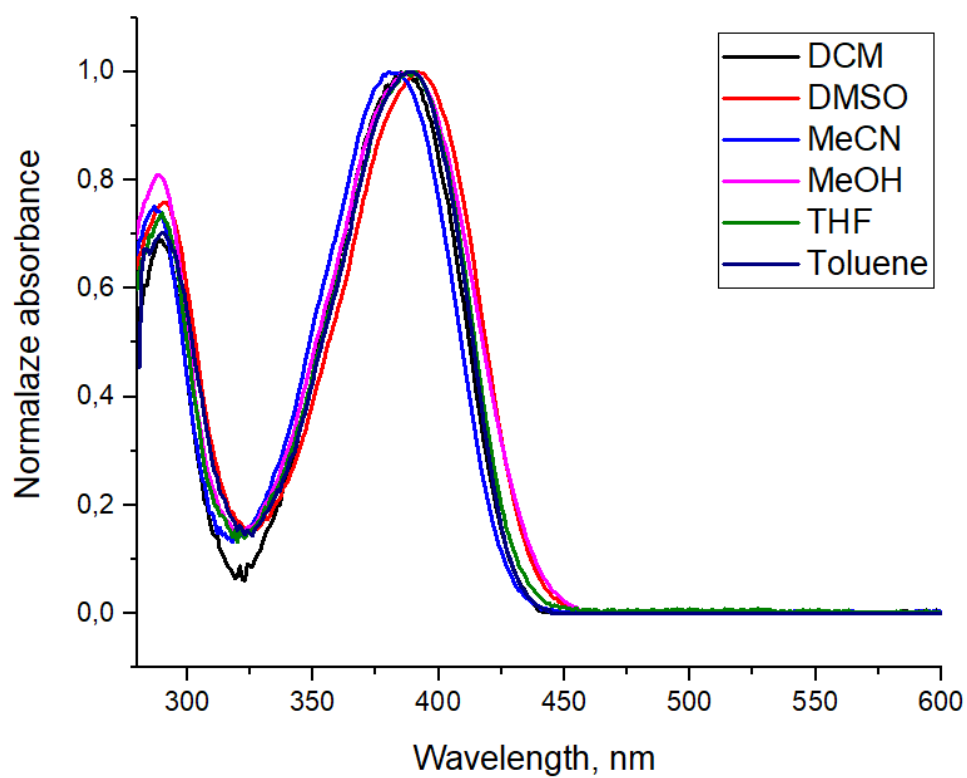

Figure S7. Normalized absorbance spectra of **3a**

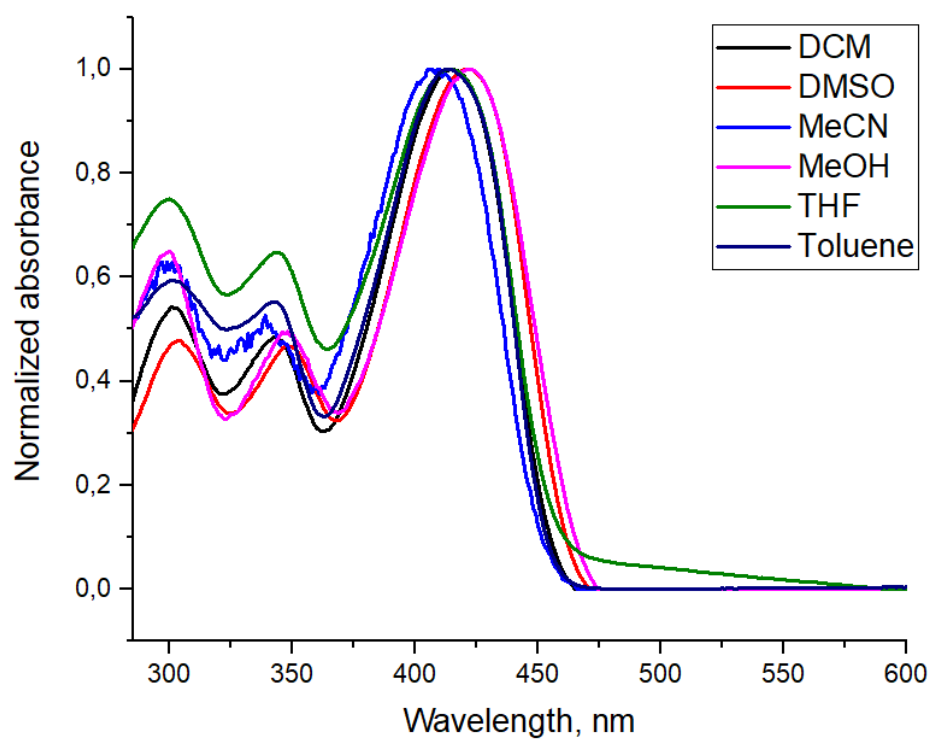

Figure S8. Normalized absorbance spectra of **3b**

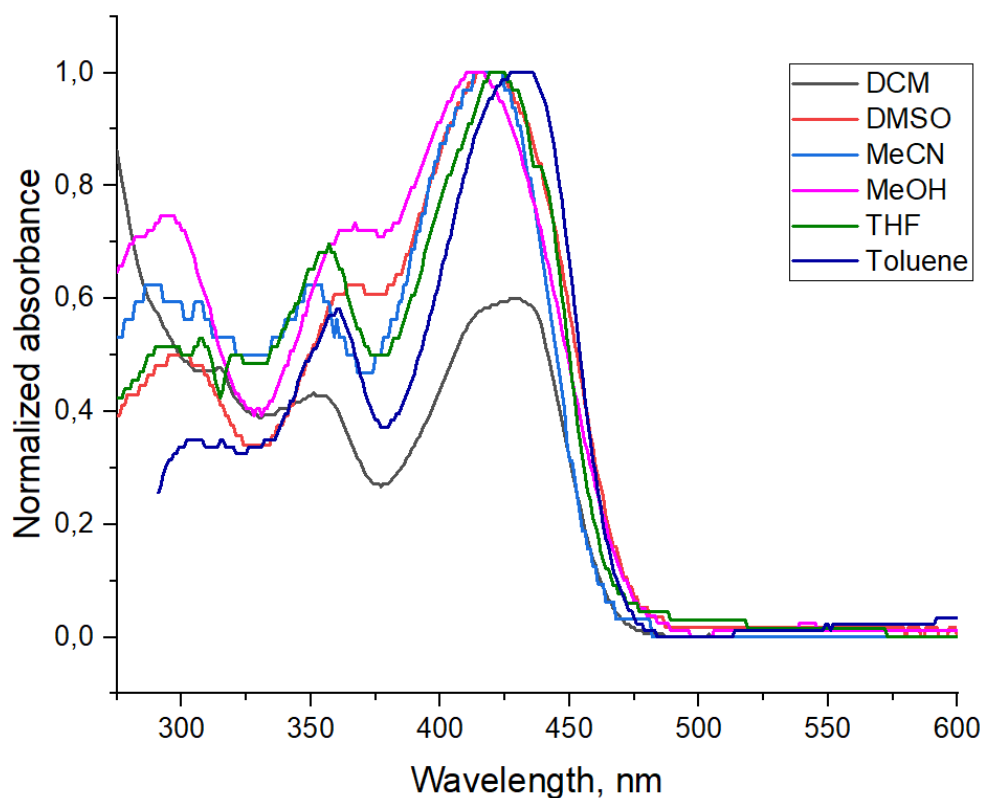

Figure S9. Normalized absorbance spectra of **4**

### 2.2. Lippert-Mataga plot of compound **3a,b**

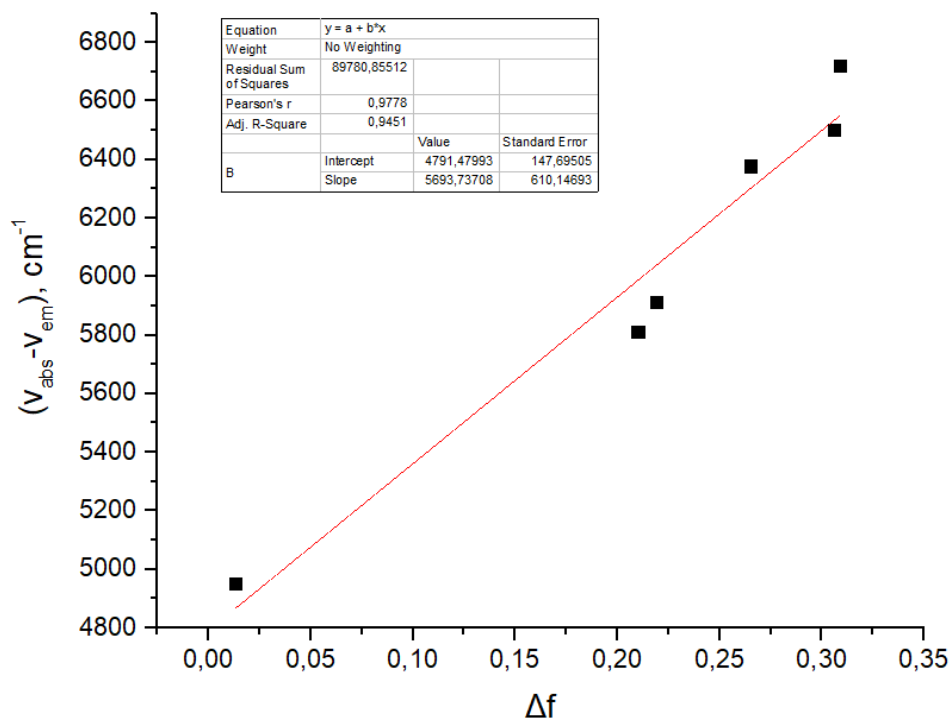

Figure S10. Lippert-Mataga plot of compound **3a**

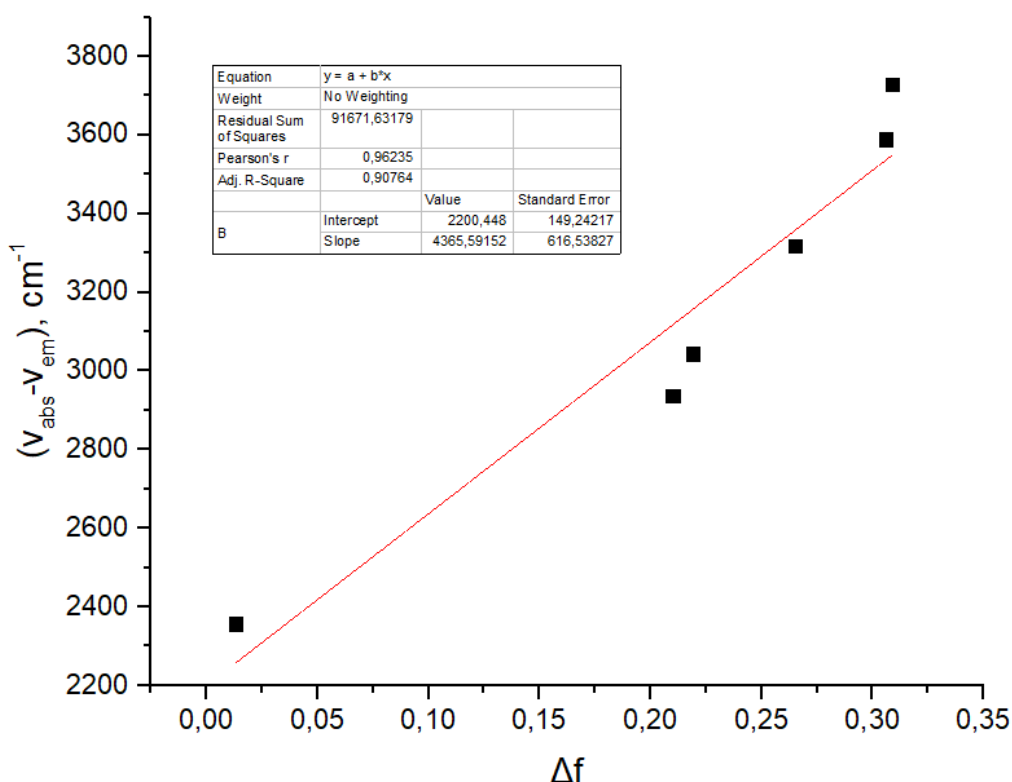

Figure S11. Lippert-Mataga plot of compound **3b**

### 2.3. Lifetime measurement

Fluorescence decay parameters for compounds **3a,b** are  $\lambda_{\text{ex}} = 370$  nm, the decay times ( $\tau_1$ ,  $\tau_2$ , and  $\tau_3$ ), the respective fractional contributions ( $\alpha_1$ ,  $\alpha_2$  and  $\alpha_3$ ), the weighted average decay time ( $\tau_{\text{av}}$ ) and the quality of fitting ( $\chi^2$ ) are shown in Table 1.

When studying the effect of substituents on the luminescence lifetime, it was found that the lifetime of both compounds is  $\sim 1.5$  ns. Thus, the presence of the second donor substituent in 1,3,7-triazapyrene moiety does not increase the fluorescence lifetime.

Table S1. Lifetime measurement of compounds **3a,b**

| Compound  | $\tau_1$ (ns) <sup>a</sup> | $\alpha_1$ <sup>b</sup> | $\tau_2$ (ns) <sup>a</sup> | $\alpha_2$ <sup>b</sup> | $\tau_3$ (ns) <sup>a</sup> | $\alpha_3$ <sup>b</sup> | $\tau_{\text{av}}$ <sup>c</sup> (ns) | $\chi^2$ <sup>d</sup> |
|-----------|----------------------------|-------------------------|----------------------------|-------------------------|----------------------------|-------------------------|--------------------------------------|-----------------------|
| <b>3a</b> | 0.39                       | 34.79                   | 0.39                       | -34.63                  | 1.64                       | 0.84                    | 1.58                                 | 1.12                  |
| <b>3b</b> | 0.5                        | 0.07                    | 1.58                       | 0.93                    | -                          | -                       | 1.50                                 | 0.94                  |

a: Decay time; b: Fractional contribution; c: Weighted average decay time  $\tau_{\text{av}} = \sum (\tau_i \times \alpha_i)$ ; d: Quality of fitting

### 3. Nitroaromatics detection spectra

#### 3.1. Absorption spectra of nitroaromatics

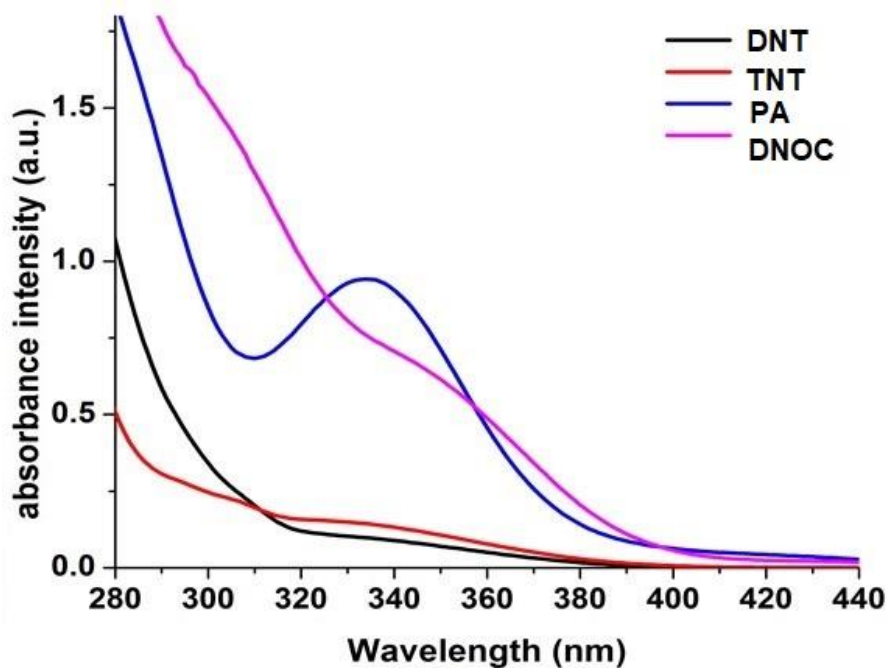

Figure S12. Absorption spectra of nitroaromatic analytes. Sample preparation:  $C = 10^{-5}$  M in MeCN

#### 3.2. Stern-Volmer calculations

The Stern-Volmer quenching model show the dependence of the change in the emission intensity on the analyte concentration is determined.

$$I_0/I = 1 + K_{sv} [Q]$$

The coupling constant for the Stern-Volmer equation was calculated as the tangent of the slope of the dependence plot  $((I_0/I)-1)$  on the concentration of the quencher ( $[Q]$ ). The analyte concentration  $[Q]$  was recalculated using the formula:  $[Q] = (C_q \times V_q)/(V_q+3E-3)$ .



### 3.3. Quenching mechanism

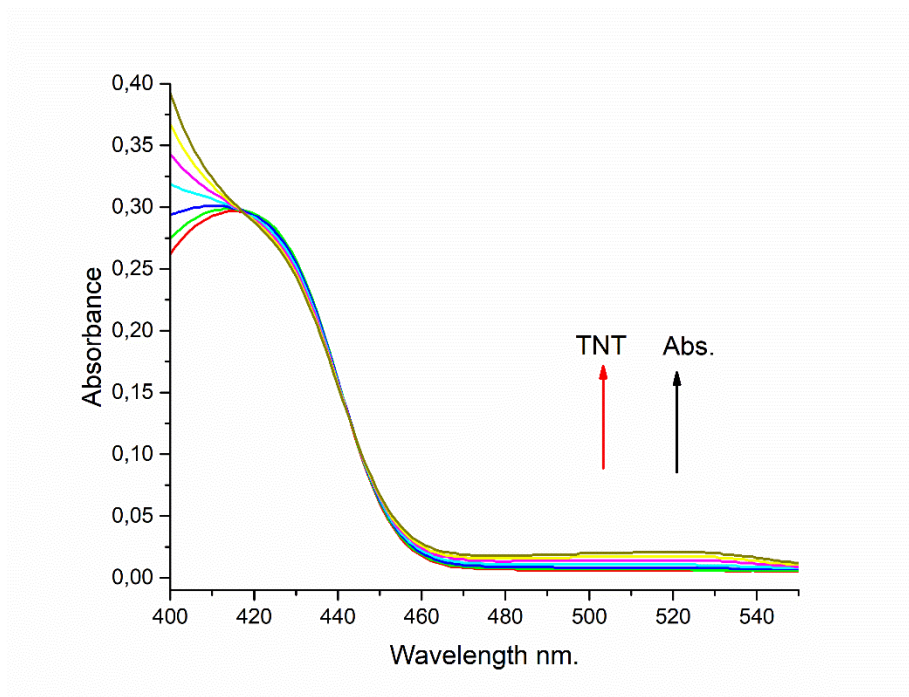

Figure S13. Experiments on quenching the absorption of the sensor **3b** ( $C = 10^{-6}$  M) with a solution of TNT ( $C = 2 \times 10^{-5}$  M)

Table S2. Lifetime measurement of compound **3b** ( $C = 10^{-6}$  M) upon addition of TNT ( $C = 2 \times 10^{-4}$  M)

| $N_0$ | TNT ( $\mu\text{M}$ ) | $\tau_1$ (ns) <sup>a</sup> | $\alpha_1$ <sup>b</sup> | $\tau_2$ (ns) <sup>a</sup> | $\alpha_2$ <sup>b</sup> | $\tau_{\text{av}}$ (ns) <sup>c</sup> | $\chi^2$ <sup>d</sup> |
|-------|-----------------------|----------------------------|-------------------------|----------------------------|-------------------------|--------------------------------------|-----------------------|
| 1     | 0                     | 1.06                       | 0.72                    | 1.86                       | 0.28                    | 1.28                                 | 1.04                  |
| 2     | 0.7                   | 1.07                       | 0.74                    | 1.88                       | 0.26                    | 1.28                                 | 1.10                  |
| 3     | 1.3                   | 1.04                       | 0.68                    | 1.80                       | 0.32                    | 1.28                                 | 1.09                  |
| 4     | 1.98                  | 1.06                       | 0.75                    | 1.93                       | 0.25                    | 1.27                                 | 1.07                  |
| 5     | 2.6                   | 1.05                       | 0.71                    | 1.86                       | 0.29                    | 1.28                                 | 1.12                  |
| 6     | 3.3                   | 1.06                       | 0.71                    | 1.85                       | 0.29                    | 1.28                                 | 1.00                  |
| 7     | 3.9                   | 1.03                       | 0.66                    | 1.79                       | 0.34                    | 1.28                                 | 1.04                  |
| 8     | 4.6                   | 1.07                       | 0.74                    | 1.90                       | 0.26                    | 1.28                                 | 1.05                  |
| 9     | 5.2                   | 1.01                       | 0.64                    | 1.79                       | 0.36                    | 1.29                                 | 1.10                  |

a: Decay time, b: Fractional contribution, c: Weighted average decay time  $\tau_{\text{av}} = \sum (\tau_i \times \alpha_i)$ , d: Quality of fitting

### 3.4. Perrin calculation

During excitation, one or more analyte molecules can be statistically located within the sphere of interaction around the luminescent particles at a suitable distance to form a non-fluorescent complex, while outside this sphere the quencher does not affect the fluorescence of the sensor [1]. Perrin's static model is described by the following equation:

$$\frac{I_0}{I} = \exp(K_p[Q])$$

$$K_p = V_q N_A = \frac{4}{3} \pi R_s^3 N_A$$

Where  $N_A$  – Avogadro's number,  $I$  fluorescence intensity in the presence of a quencher,  $I_0$  – fluorescence intensity when the concentration of the quencher is zero,  $R_s$  – the radius of the sphere.

Perrin radius values for sensors **3a,b** were calculated from the slope of the dependence  $\ln(I_0/I)$  to the concentration of the quencher  $[Q]$ .

### 3.5. Stern-Volmer, Perrin, and LOD graphs for compound 3a

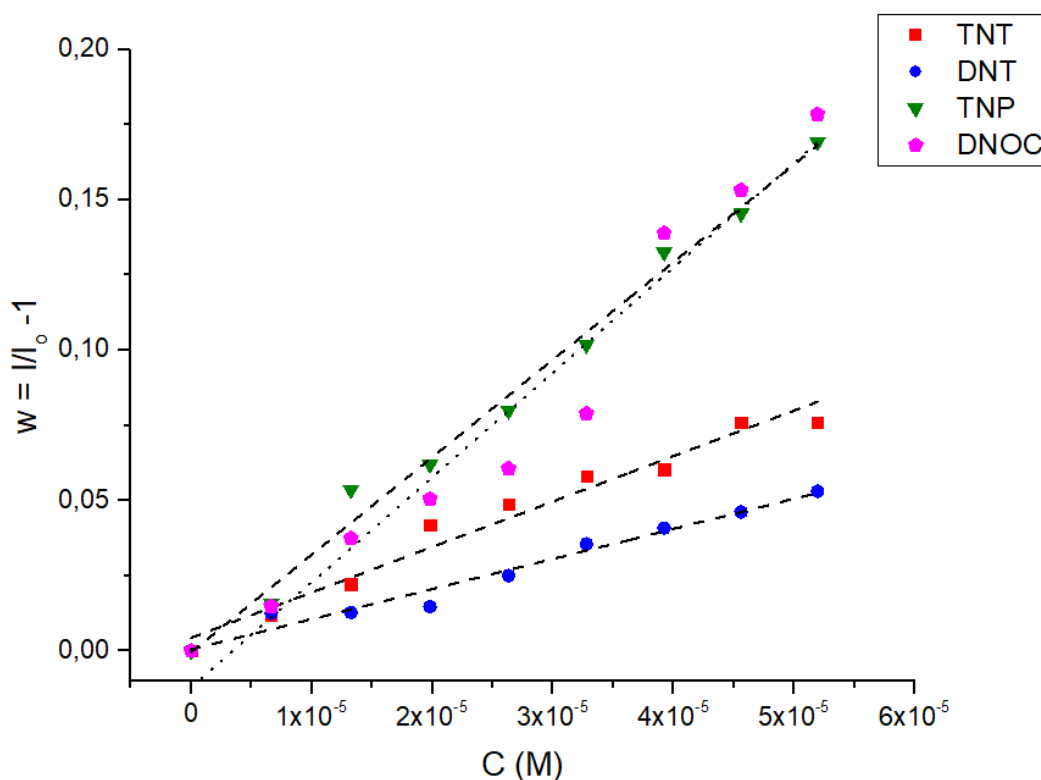

Figure S14. Stern-Volmer plots for compound **3a**. Sample preparation: for TNT:  $C(\mathbf{3a}) = 5 \cdot 10^{-6}$  M,  $\lambda_{em} = 460$  nm, for DNT:  $C(\mathbf{3a}) = 5 \cdot 10^{-6}$  M,  $\lambda_{em} = 460$  nm, for TNP:  $C(\mathbf{3a}) = 1 \cdot 10^{-5}$  M,  $\lambda_{em} = 420$  nm, for DNOC:  $C(\mathbf{3a}) = 1 \cdot 10^{-5}$  M,  $\lambda_{em} = 420$  nm.

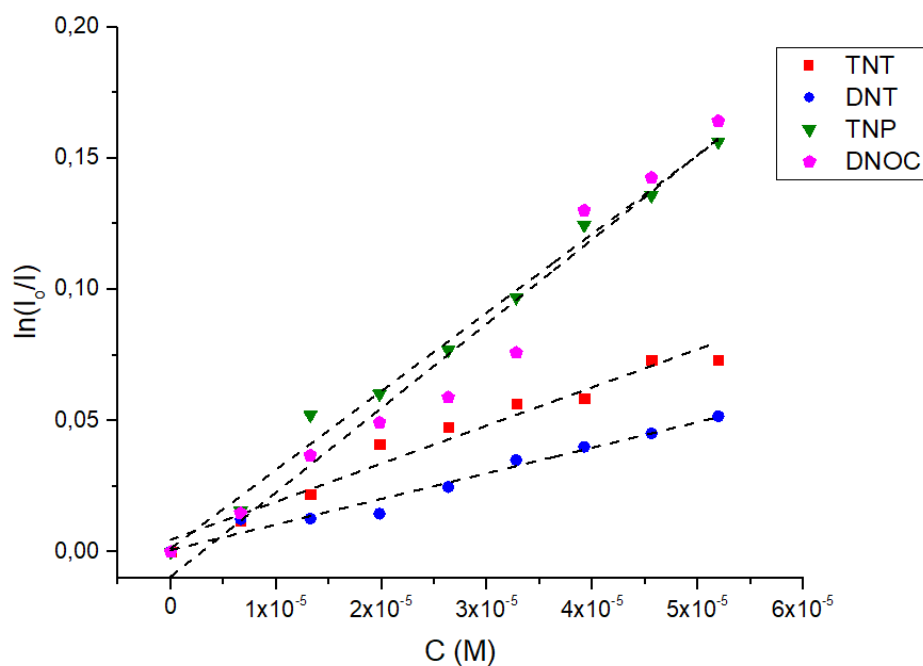

Figure S15. Perrin plots for compound **3a**. Sample preparation: for TNT:  $C(\mathbf{3a}) = 5 \cdot 10^{-6}$  M,  $\lambda_{em} = 460$  nm, for DNT:  $C(\mathbf{3a}) = 5 \cdot 10^{-6}$  M,  $\lambda_{em} = 460$  nm, for TNP:  $C(\mathbf{3a}) = 1 \cdot 10^{-5}$  M,  $\lambda_{em} = 420$  nm, for DNOC:  $C(\mathbf{3a}) = 1 \cdot 10^{-5}$  M,  $\lambda_{em} = 420$  nm.

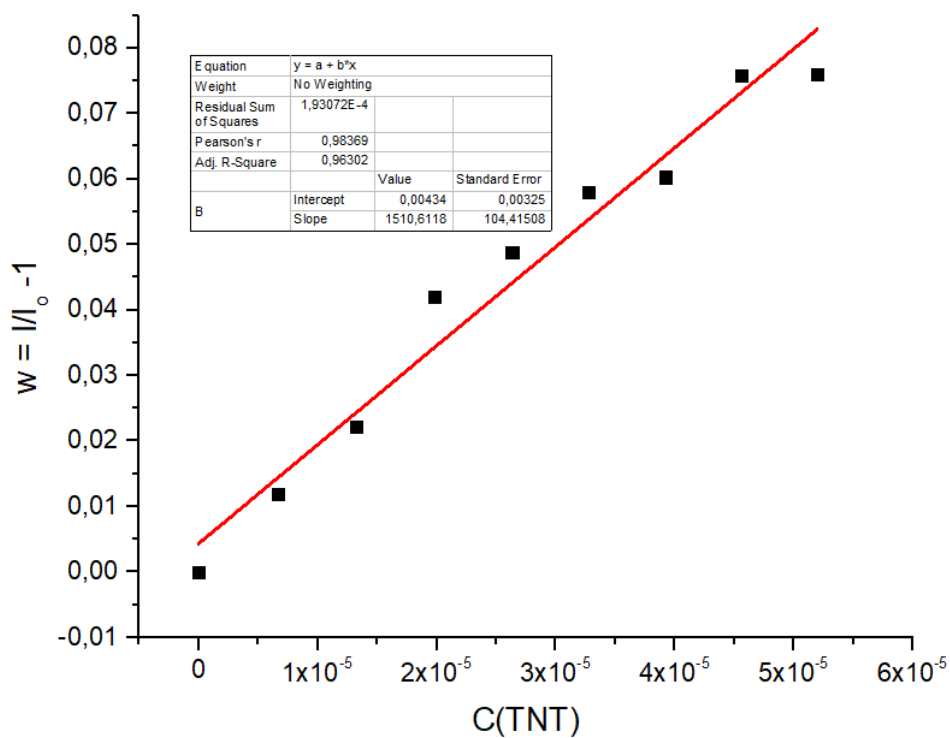

Figure S16. Stern-Volmer plot for compound **3a** in the presence of TNT. Sample preparation:  $C(\mathbf{3a}) = 5 \cdot 10^{-6}$  M,  $\lambda_{em} = 460$  nm

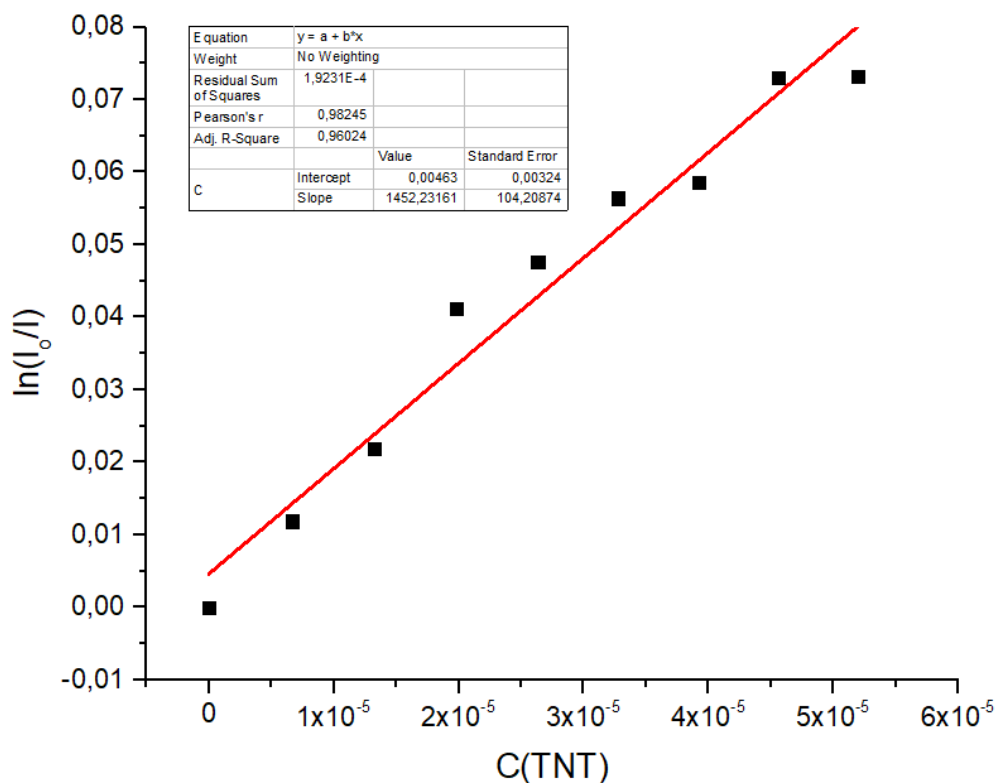

Figure S17. Perrin plot for compound **3a** in the presence of TNT. Sample preparation:  $C(\mathbf{3a}) = 5 \cdot 10^{-6}$  M,  $\lambda_{em} = 460$  nm

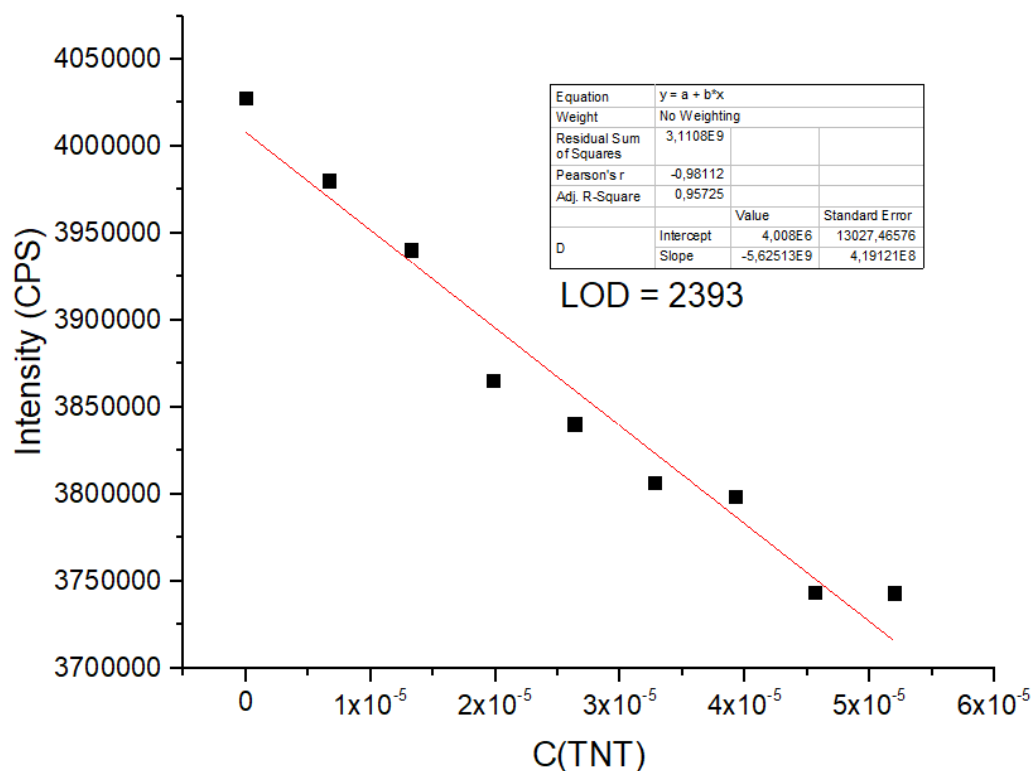

Figure S18. Limit of detection (LOD) plot for compound **3a** in the presence of TNT. Sample preparation:  $C(\mathbf{3a}) = 5 \cdot 10^{-6}$  M,  $\lambda_{em} = 460$  nm

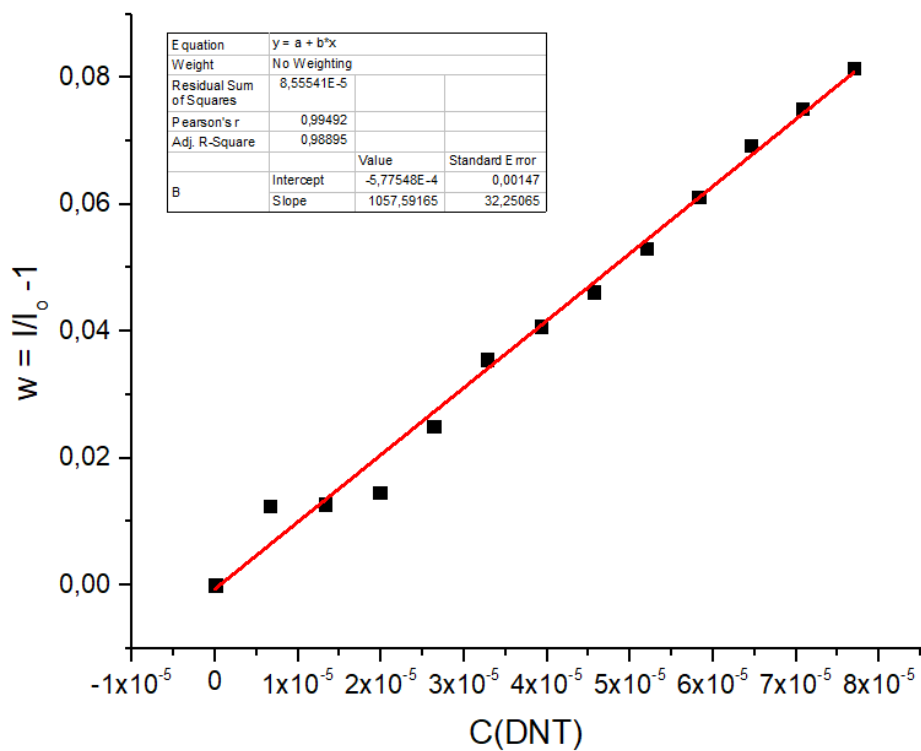

Figure S19. Stern-Volmer plot for compound **3a** in the presence of DNT. Sample preparation:  $C(\mathbf{3a}) = 5 \cdot 10^{-6}$  M,  $\lambda_{em} = 460$  nm

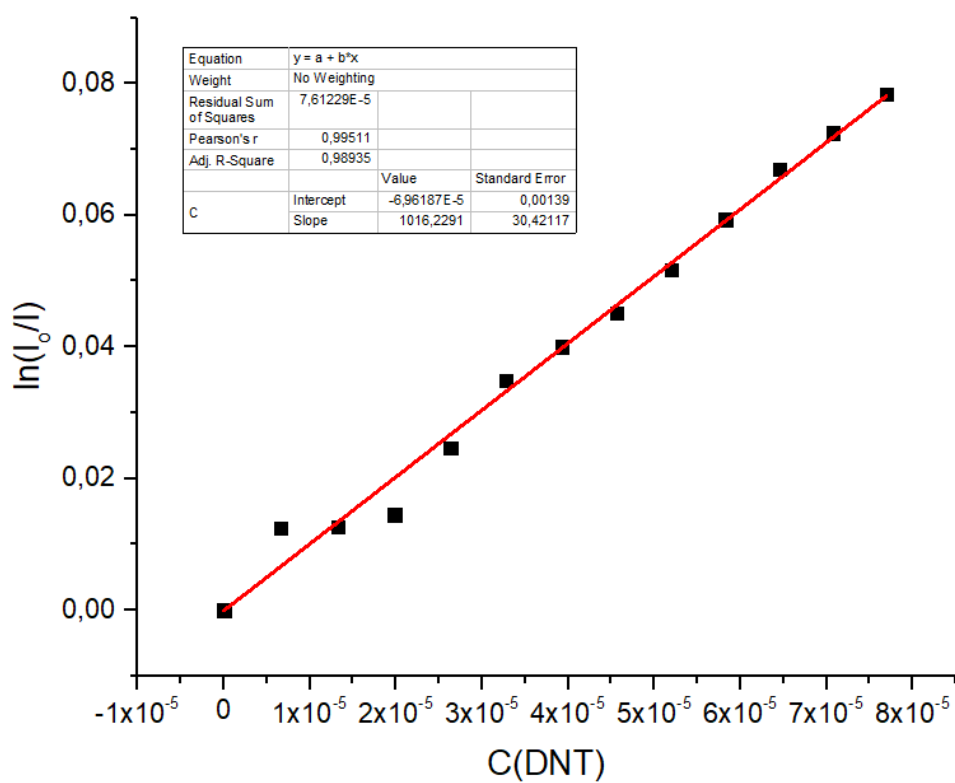

Figure S20. Perrin plot for compound **3a** in the presence of DNT. Sample preparation:  $C(\mathbf{3a}) = 5 \cdot 10^{-6}$  M,  $\lambda_{em} = 460$  nm

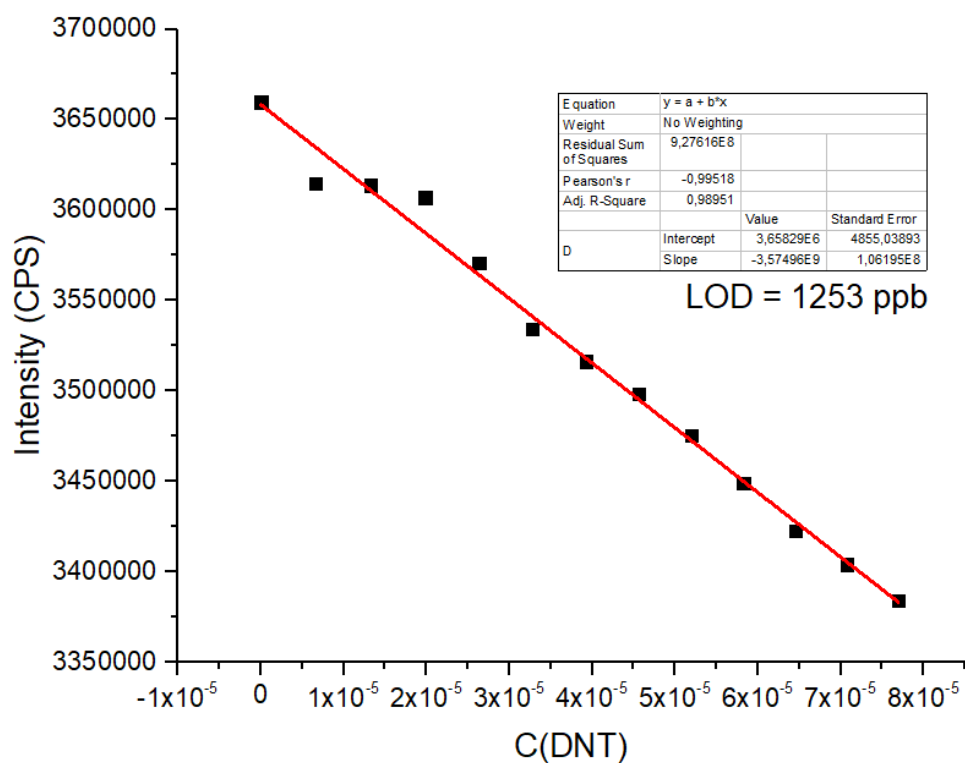

Figure S21. Limit of detection (LOD) plot for compound **3a** in the presence of DNT. Sample preparation:  $C(\mathbf{3a}) = 5 \cdot 10^{-6}$  M,  $\lambda_{em} = 460$  nm

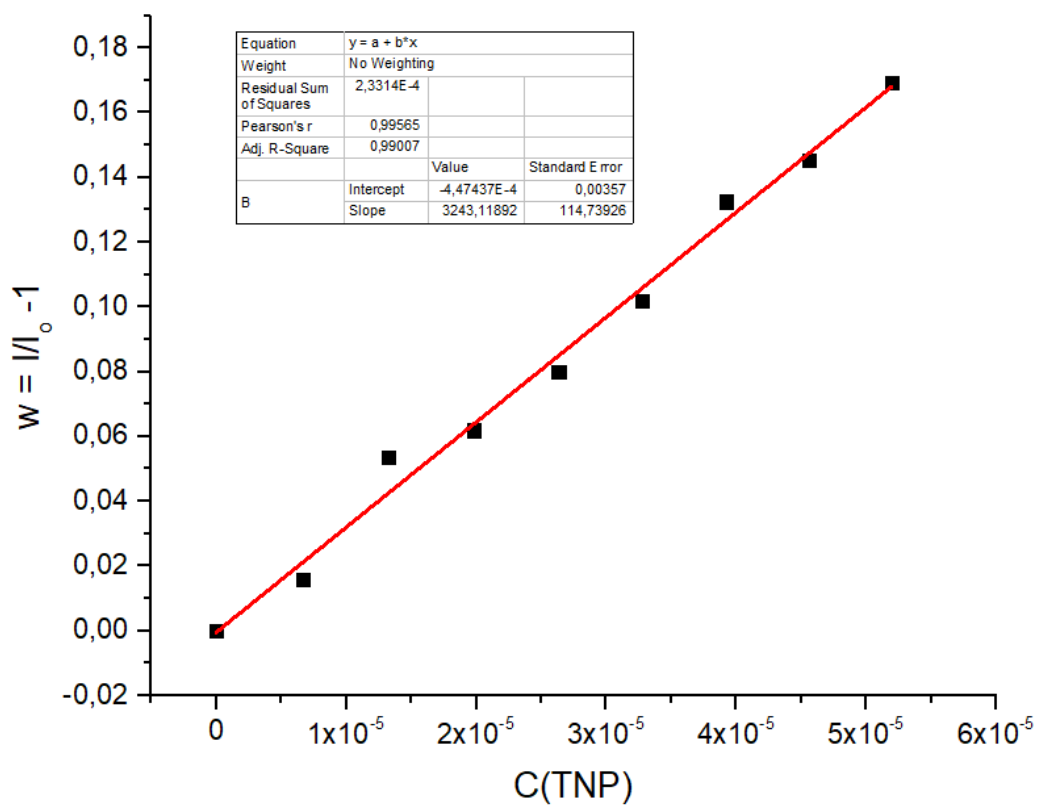

Figure S22. Stern-Volmer plot for compound **3a** in the presence of TNP. Sample preparation:  $C(\mathbf{3a}) = 1 \cdot 10^{-5}$  M,  $\lambda_{em} = 420$  nm

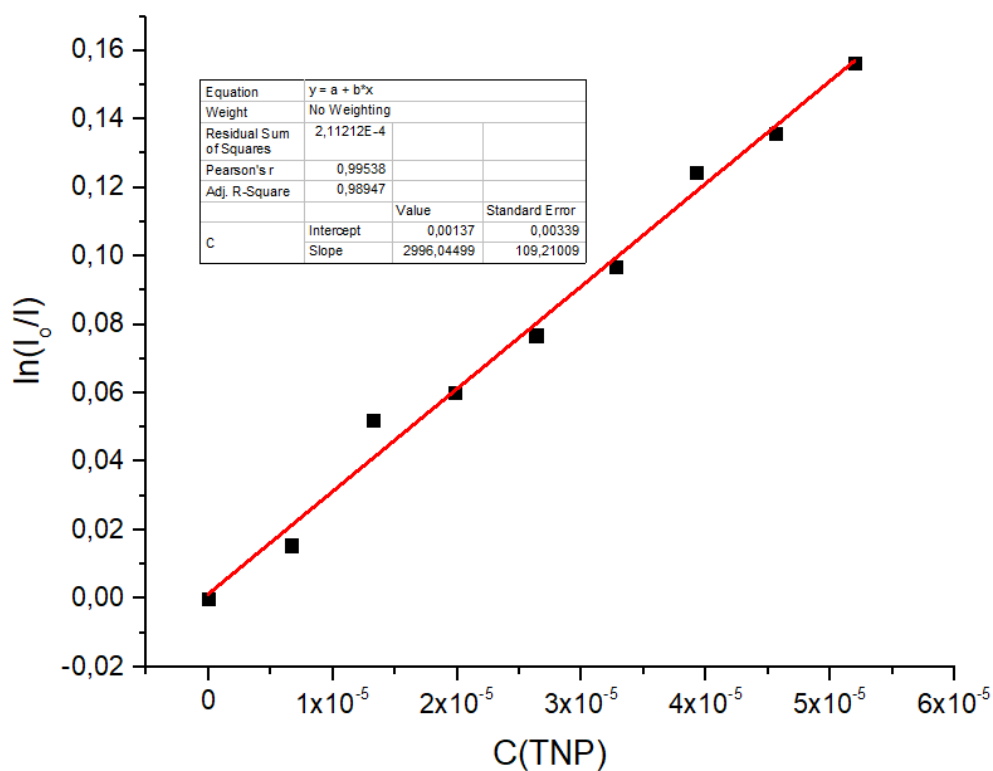

Figure S23. Perrin plot for compound **3a** in the presence of TNP. Sample preparation:  $C(\mathbf{3a}) = 1 \cdot 10^{-5}$  M,  $\lambda_{em} = 420$  nm

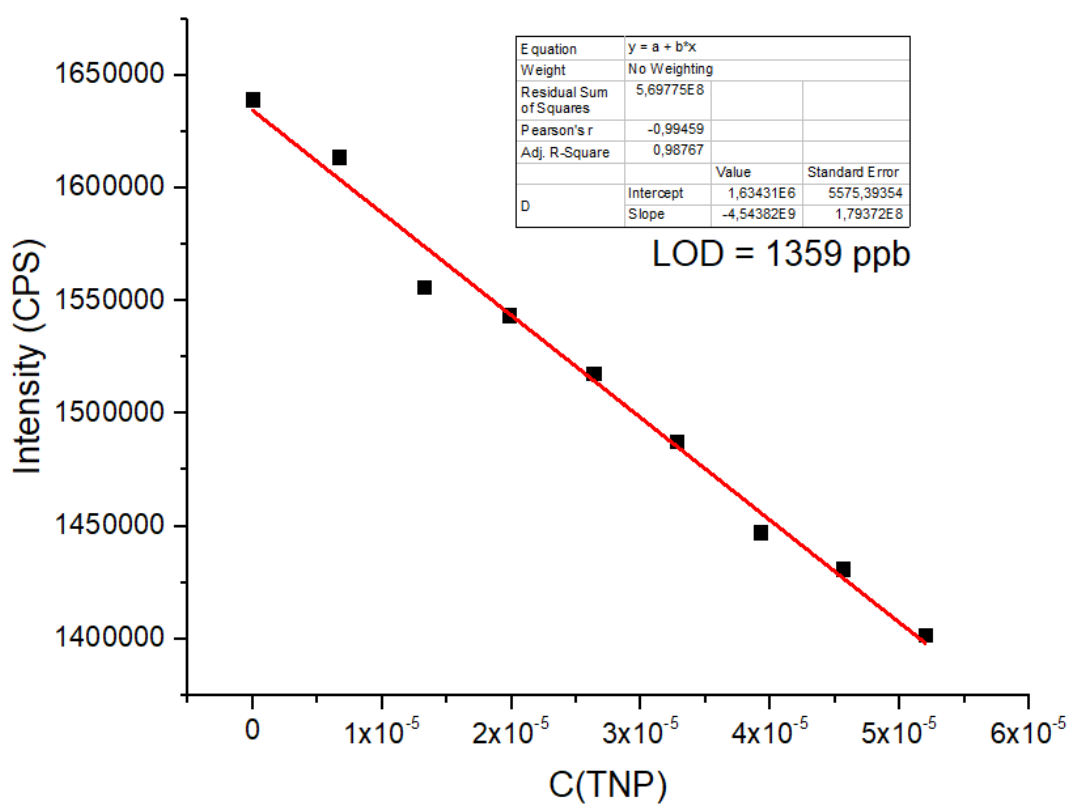

Figure S24. Limit of detection (LOD) plot for compound **3a** in the presence of TNP. Sample preparation:  $C(\mathbf{3a}) = 1 \cdot 10^{-5}$  M,  $\lambda_{em} = 420$  nm

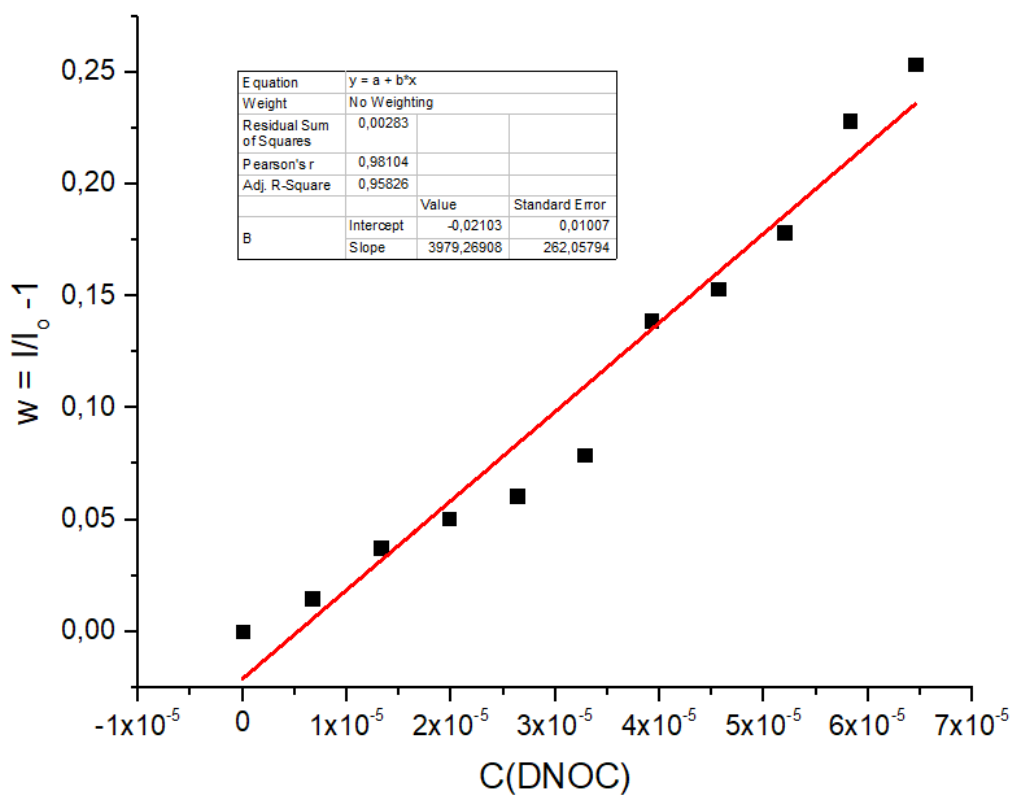

Figure S25. Stern-Volmer plot for compound **3a** in the presence of DNOC. Sample preparation:  $C(\mathbf{3a}) = 1 \cdot 10^{-5}$  M,  $\lambda_{em} = 420$  nm

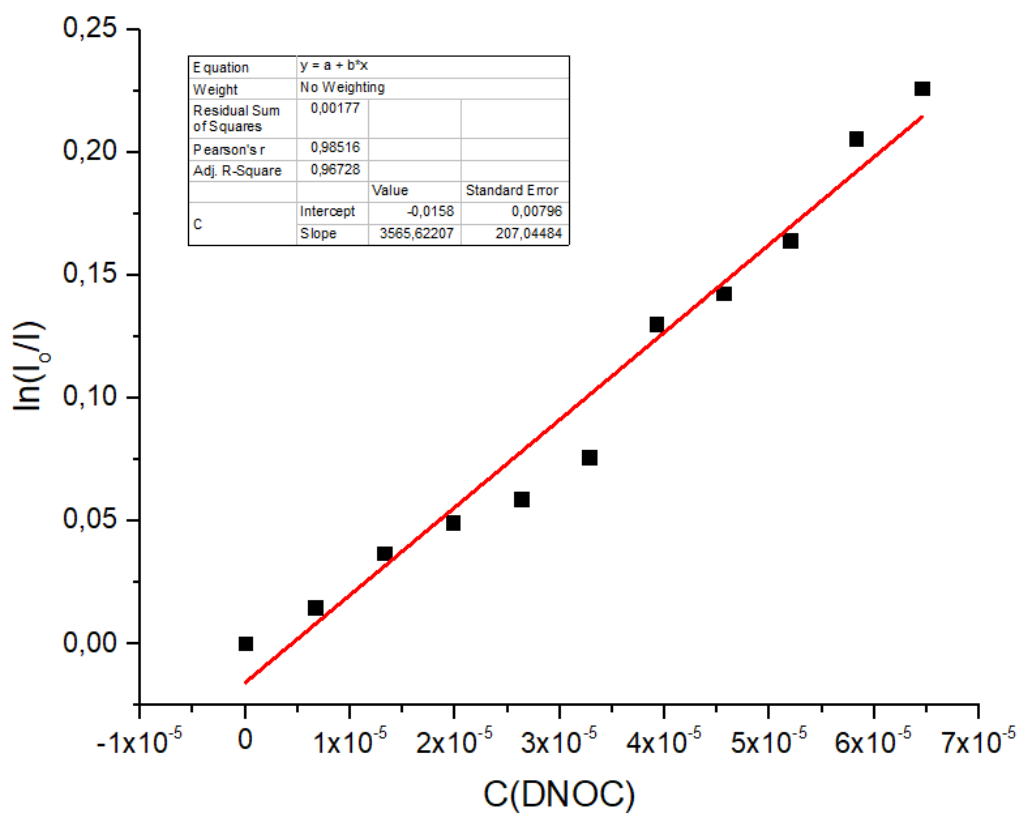

Figure S26. Perrin plot for compound **3a** in the presence of DNOC. Sample preparation:  $C(\mathbf{3a}) = 1 \cdot 10^{-5}$  M,  $\lambda_{em} = 420$  nm



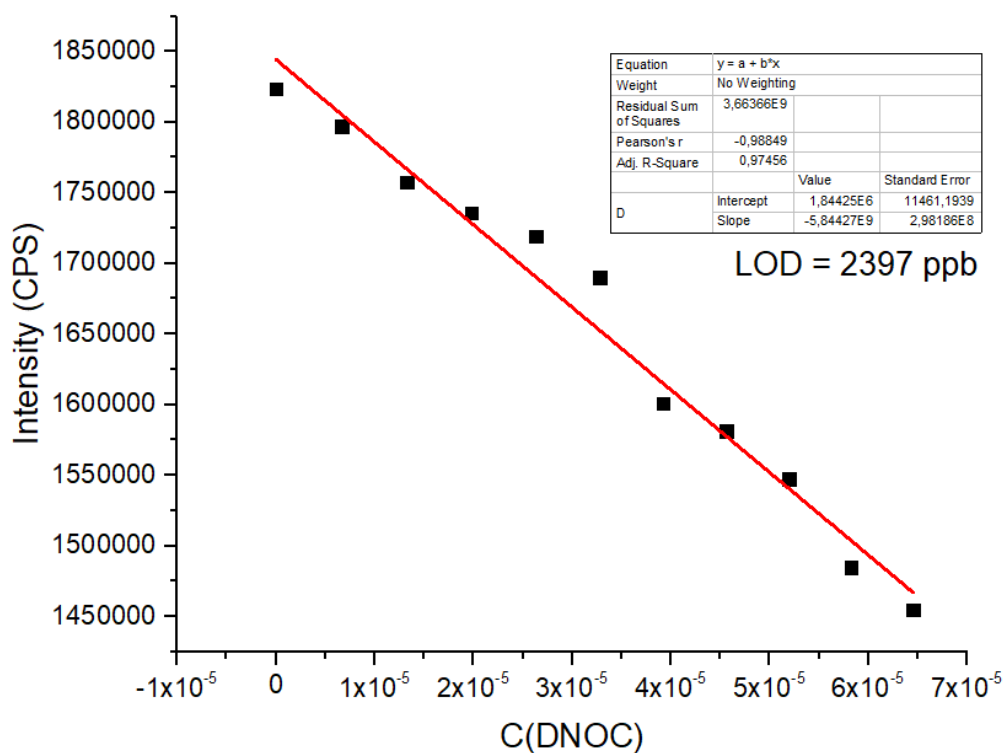

Figure S27. Limit of detection (LOD) plot for compound **3a** in the presence of TNP. Sample preparation:  $C(\mathbf{3a}) = 1 \cdot 10^{-5}$  M,  $\lambda_{em} = 420$  nm

### 3.6. Stern-Volmer, Perrin and LOD graphs for compounds **3b**

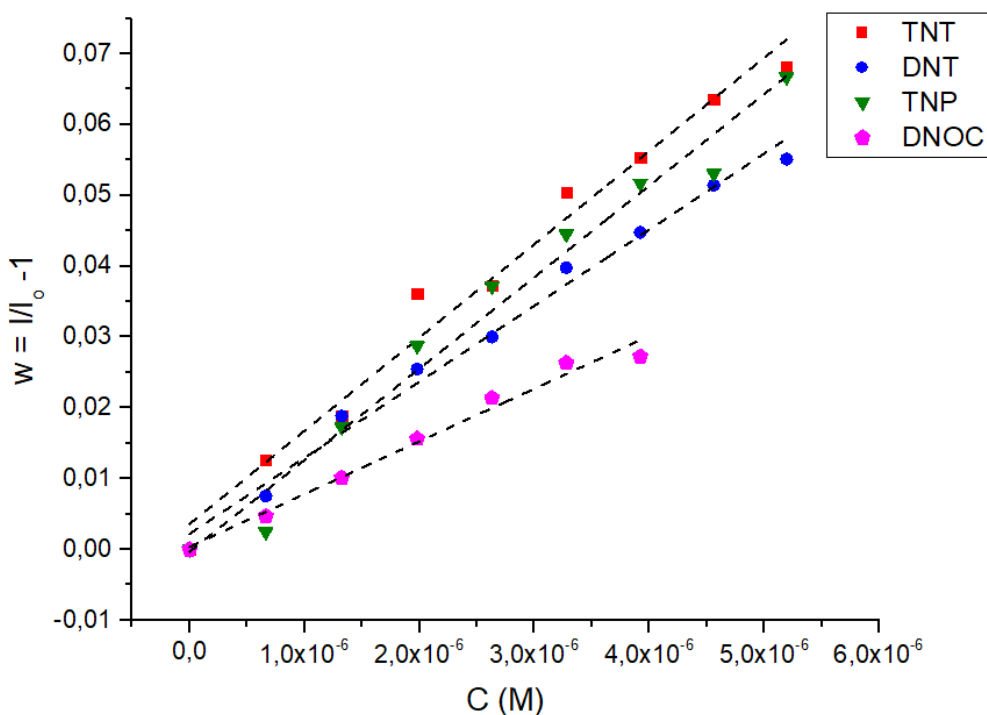

Figure S28. Stern-Volmer plots for compound **3b**. Sample preparation: for TNT:  $C(\mathbf{3b}) = 5 \cdot 10^{-6}$  M,  $\lambda_{em} = 465$  nm, for DNT:  $C(\mathbf{3b}) = 5 \cdot 10^{-6}$  M,  $\lambda_{em} = 465$  nm, for TNP:  $C(\mathbf{3b}) = 3 \cdot 10^{-6}$  M,  $\lambda_{em} = 470$  nm, for DNOC:  $C(\mathbf{3b}) = 3 \cdot 10^{-6}$  M,  $\lambda_{em} = 470$  nm.

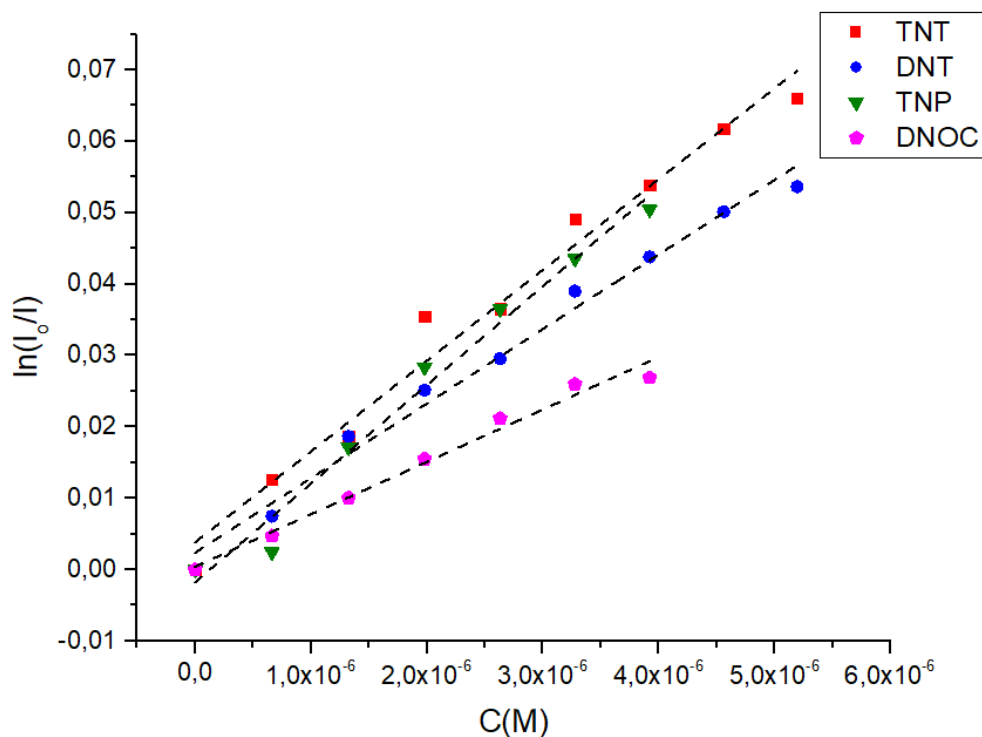

Figure S29. Perrin plots for compound **3b**. Sample preparation: for TNT:  $C(\mathbf{3b}) = 5 \cdot 10^{-6}$  M,  $\lambda_{em} = 465$  nm, for DNT:  $C(\mathbf{3b}) = 5 \cdot 10^{-6}$  M,  $\lambda_{em} = 465$  nm, for TNP:  $C(\mathbf{3a}) = 3 \cdot 10^{-6}$  M,  $\lambda_{em} = 470$  nm, for DNOC:  $C(\mathbf{3b}) = 3 \cdot 10^{-6}$  M,  $\lambda_{em} = 470$  nm.

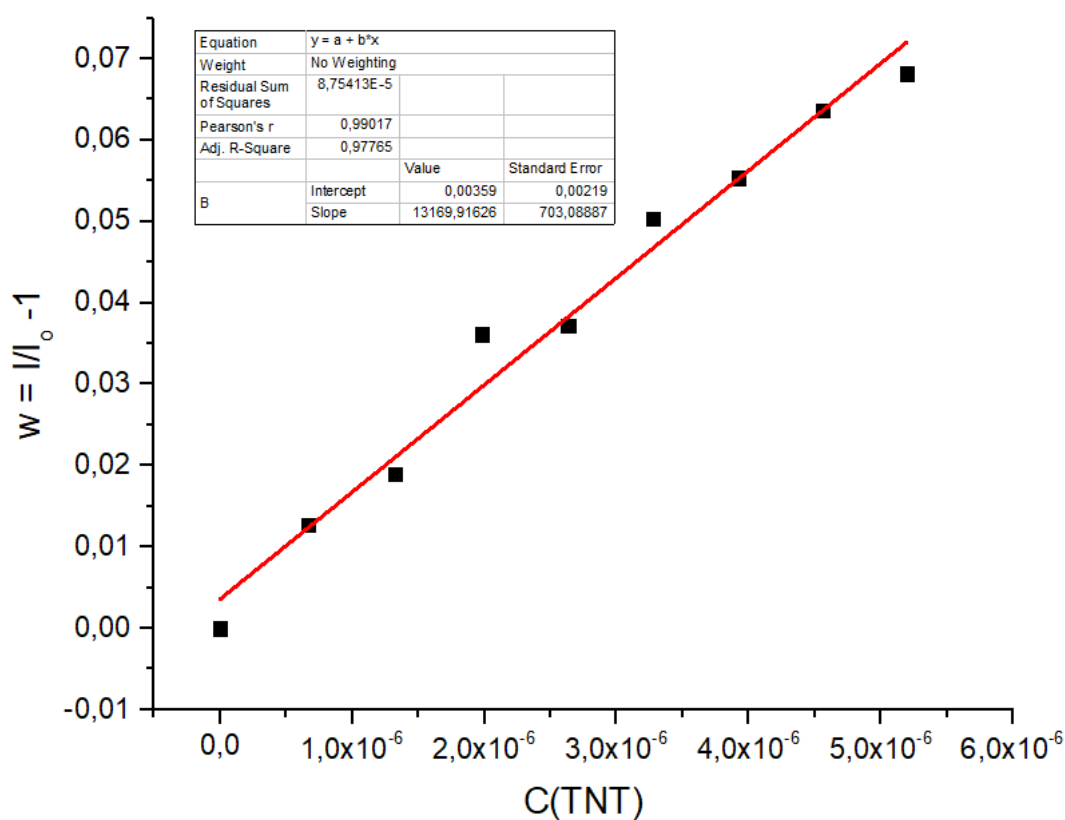

Figure S30. Stern-Volmer plot for compound **3b** in the presence of TNT. Sample preparation:  $C(\mathbf{3b}) = 5 \cdot 10^{-6}$  M,  $\lambda_{em} = 465$  nm

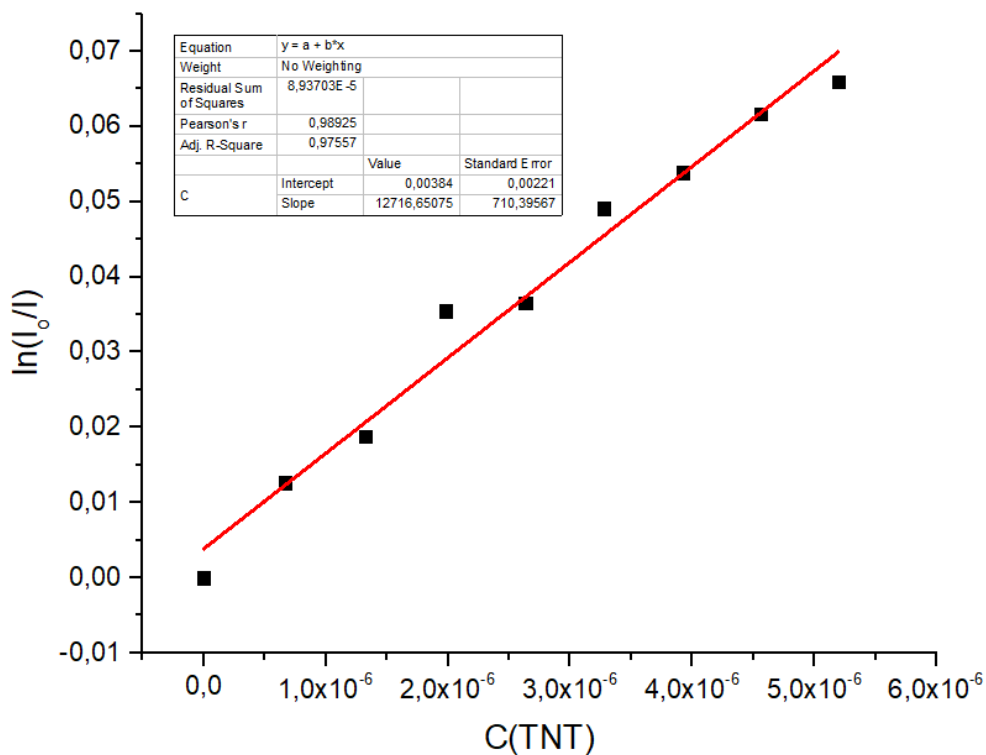

Figure S31. Stern-Volmer plot for compound **3b** in the presence of TNT. Sample preparation:  $C(\mathbf{3b}) = 5 \cdot 10^{-6} \text{ M}$ ,  $\lambda_{em} = 465 \text{ nm}$

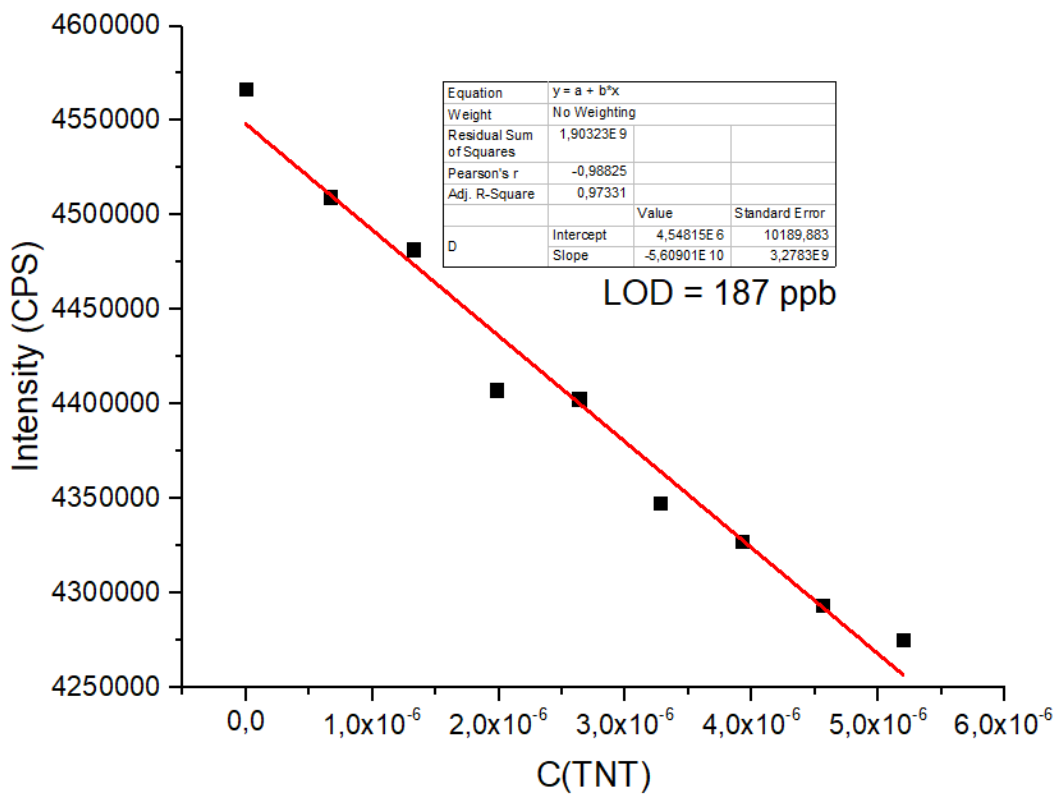

Figure S32. Limit of detection (LOD) plot for compound **3b** in the presence of TNT. Sample preparation:  $C(\mathbf{3b}) = 5 \cdot 10^{-6} \text{ M}$ ,  $\lambda_{em} = 465 \text{ nm}$

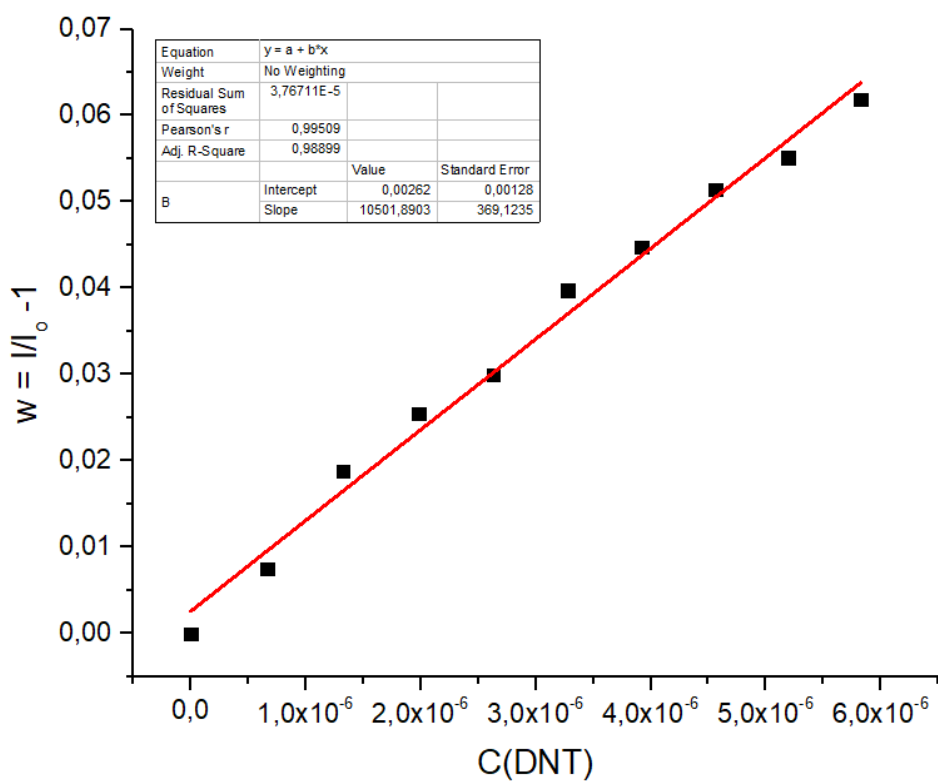

Figure S33. Stern-Volmer plot for compound **3b** in the presence of DNT. Sample preparation:  $C(\mathbf{3b}) = 5 \cdot 10^{-6} \text{ M}$ ,  $\lambda_{\text{em}} = 465 \text{ nm}$

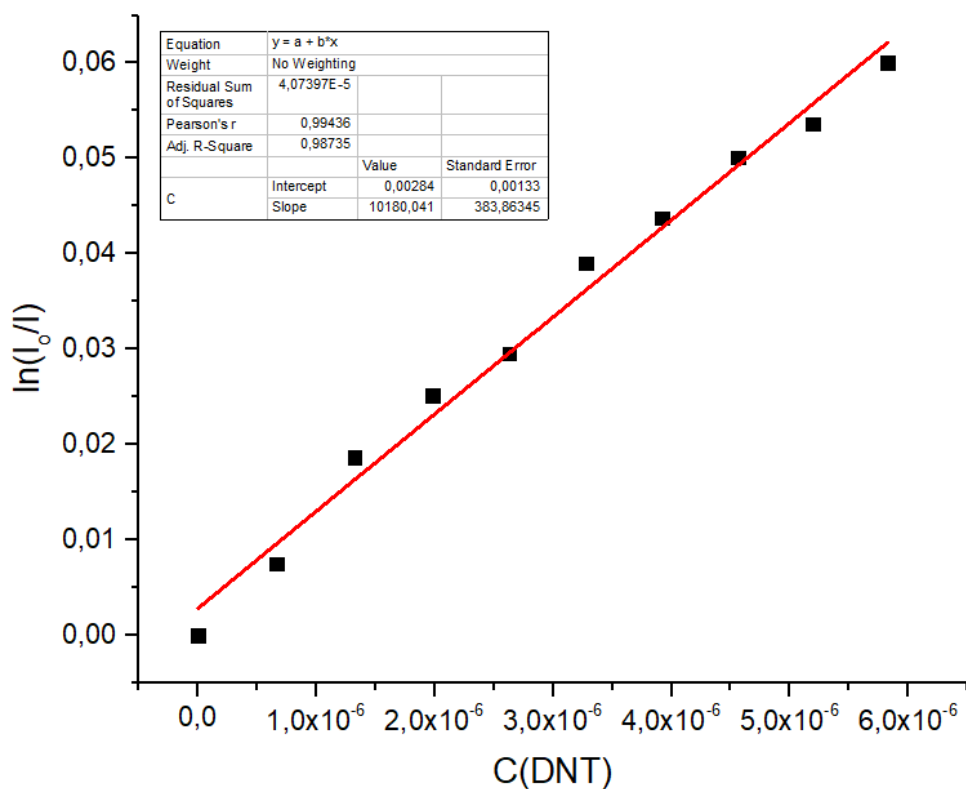

Figure S34. Perrin plot for compound **3b** in the presence of DNT. Sample preparation:  $C(\mathbf{3b}) = 5 \cdot 10^{-6} \text{ M}$ ,  $\lambda_{\text{em}} = 465 \text{ nm}$

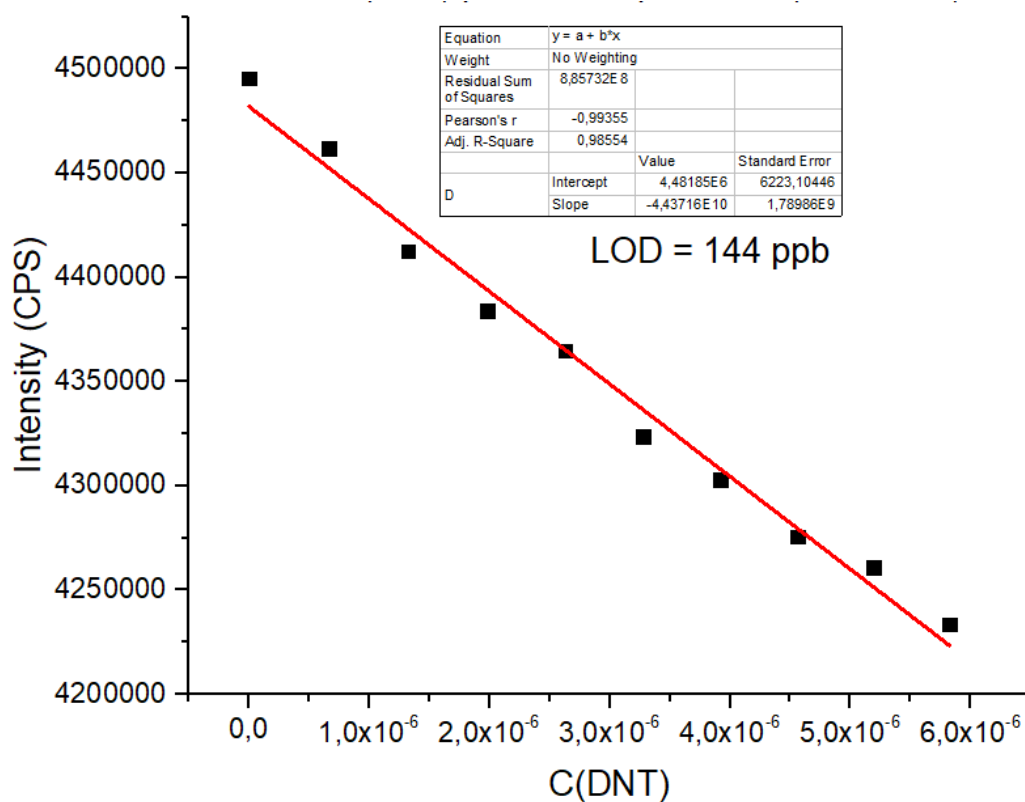

Figure S35. Limit of detection (LOD) plot for compound **3b** in the presence of DNT. Sample preparation:  $C(\mathbf{3b}) = 5 \cdot 10^{-6}$  M,  $\lambda_{em} = 465$  nm

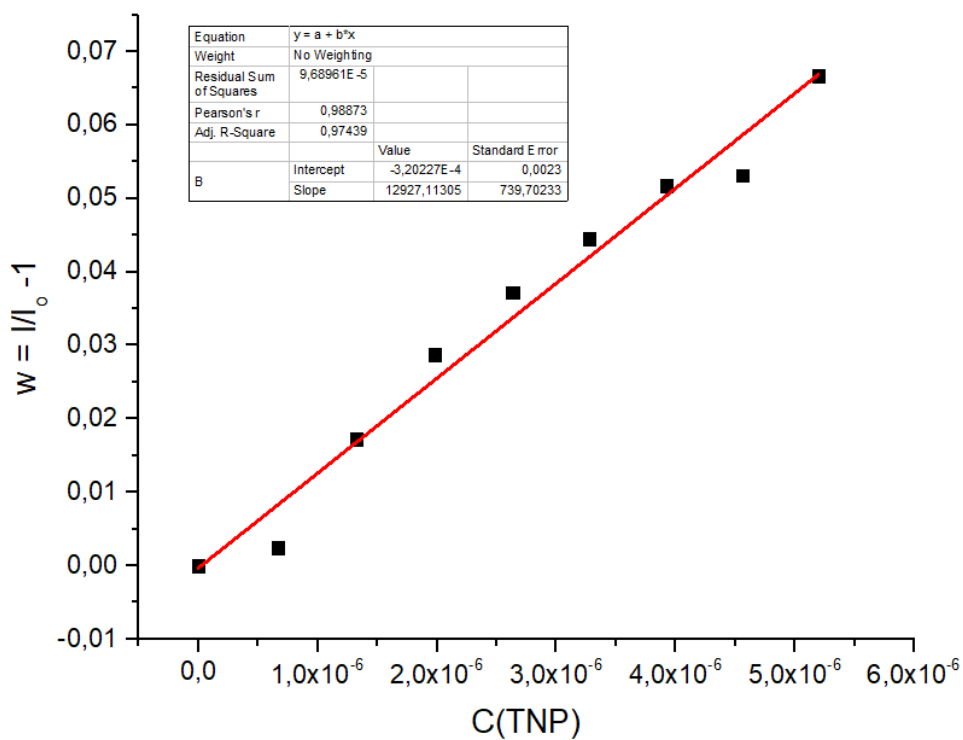

Figure S36. Stern-Volmer plot for compound **3b** in the presence of TNP. Sample preparation:  $C(\mathbf{3b}) = 3 \cdot 10^{-6}$  M,  $\lambda_{em} = 470$  nm

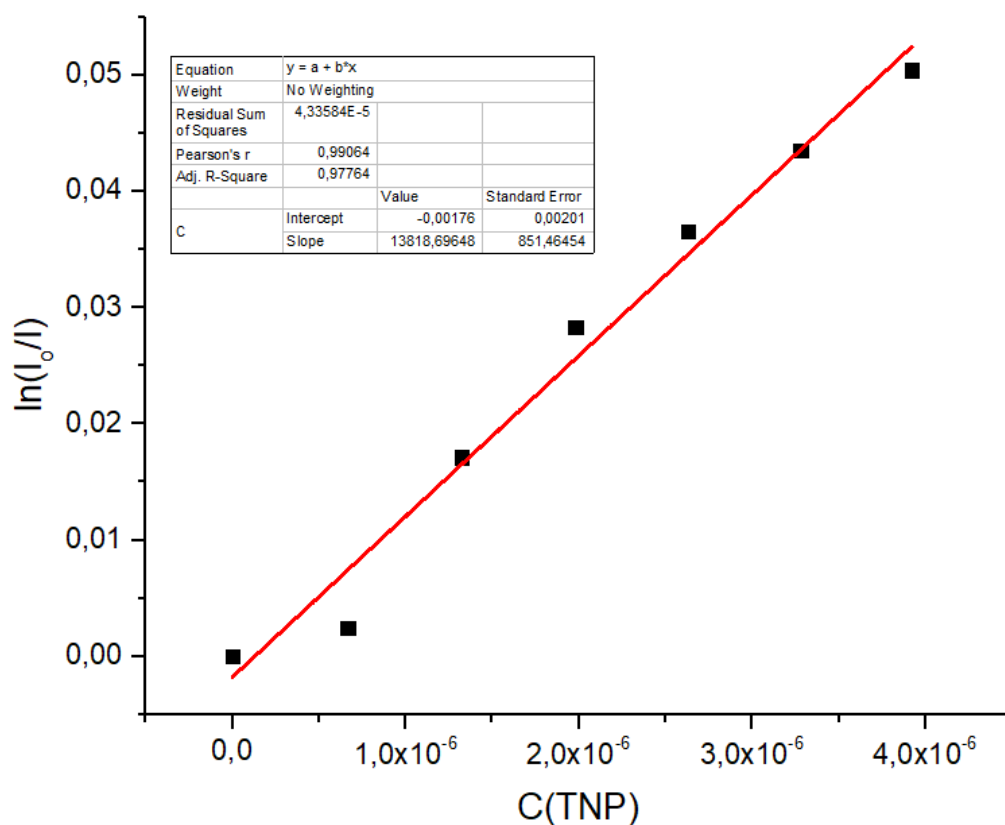

Figure S37. Perrin plot for compound **3b** in the presence of TNP. Sample preparation:  $C(\mathbf{3b}) = 3 \cdot 10^{-6}$  M,  $\lambda_{em} = 470$  nm

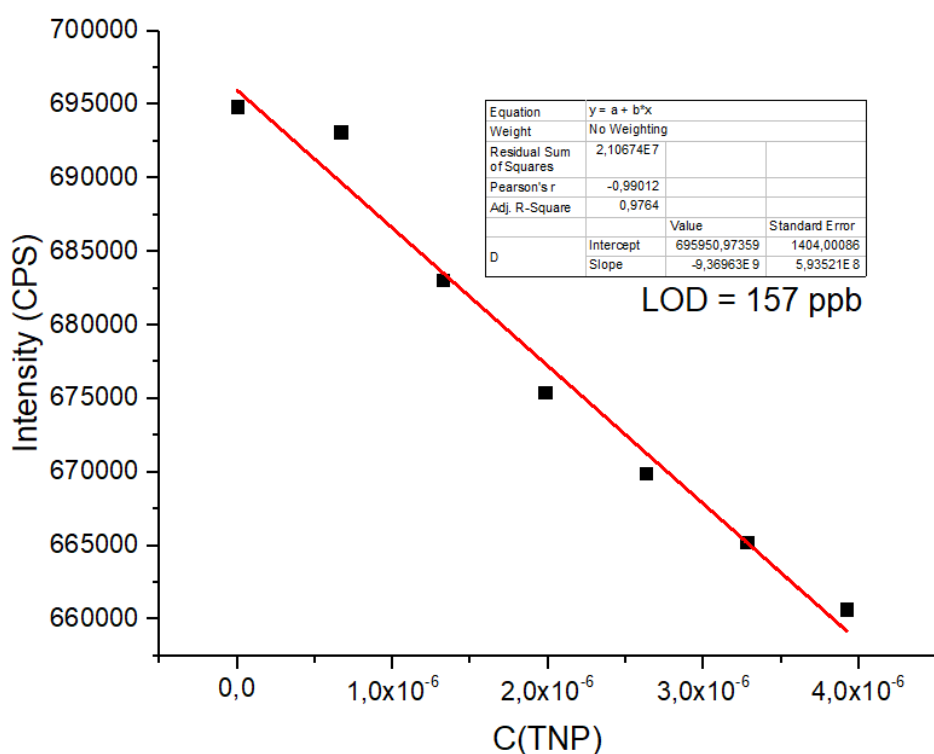

Figure S38. Limit of detection (LOD) plot for compound **3b** in the presence of TNP. Sample preparation:  $C(\mathbf{3b}) = 3 \cdot 10^{-6}$  M,  $\lambda_{em} = 470$  nm

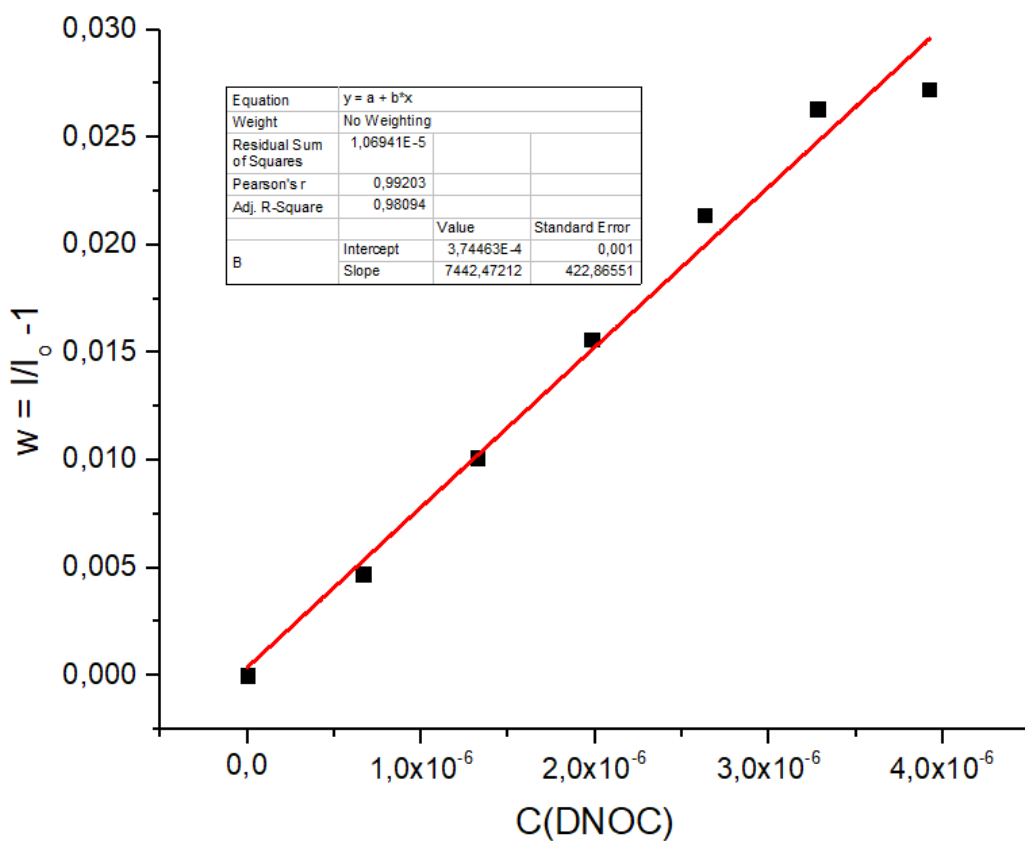

Figure S39. Stern-Volmer plot for compound **3b** in the presence of DNOC. Sample preparation:  $C(\mathbf{3b}) = 3 \cdot 10^{-6}$  M,  $\lambda_{em} = 470$  nm

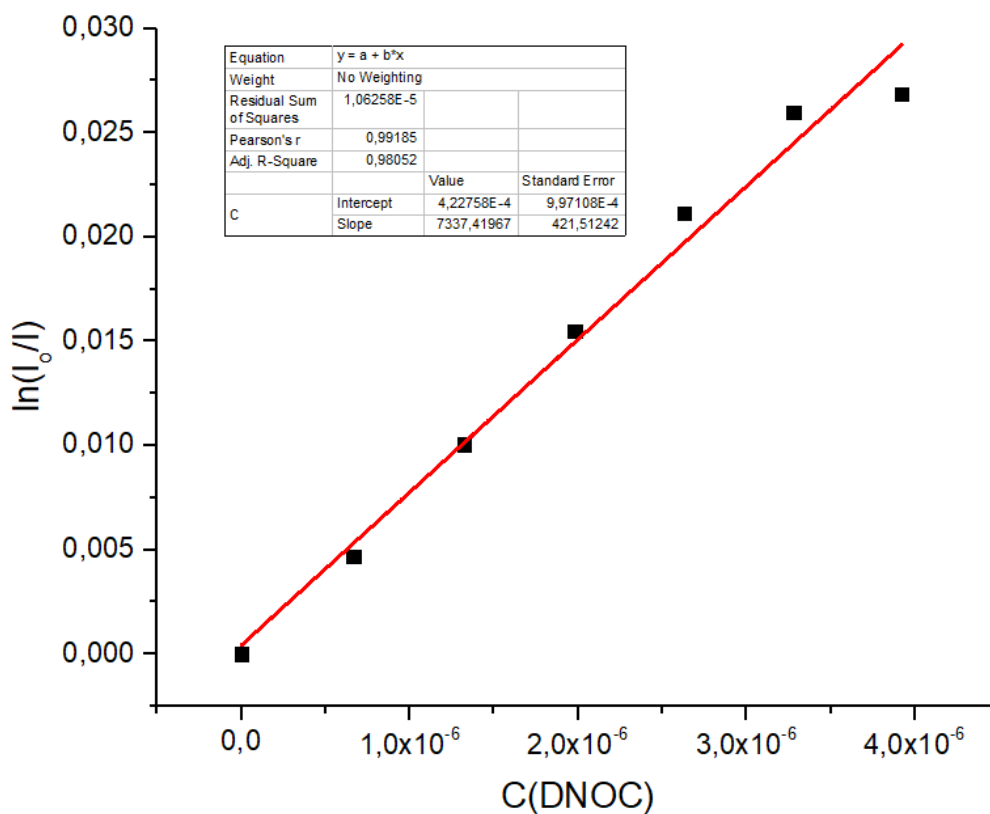

Figure S40. Perrin plot for compound **3b** in the presence of DNT. Sample preparation:  $C(\mathbf{3b}) = 3 \cdot 10^{-6}$  M,  $\lambda_{em} = 470$  nm

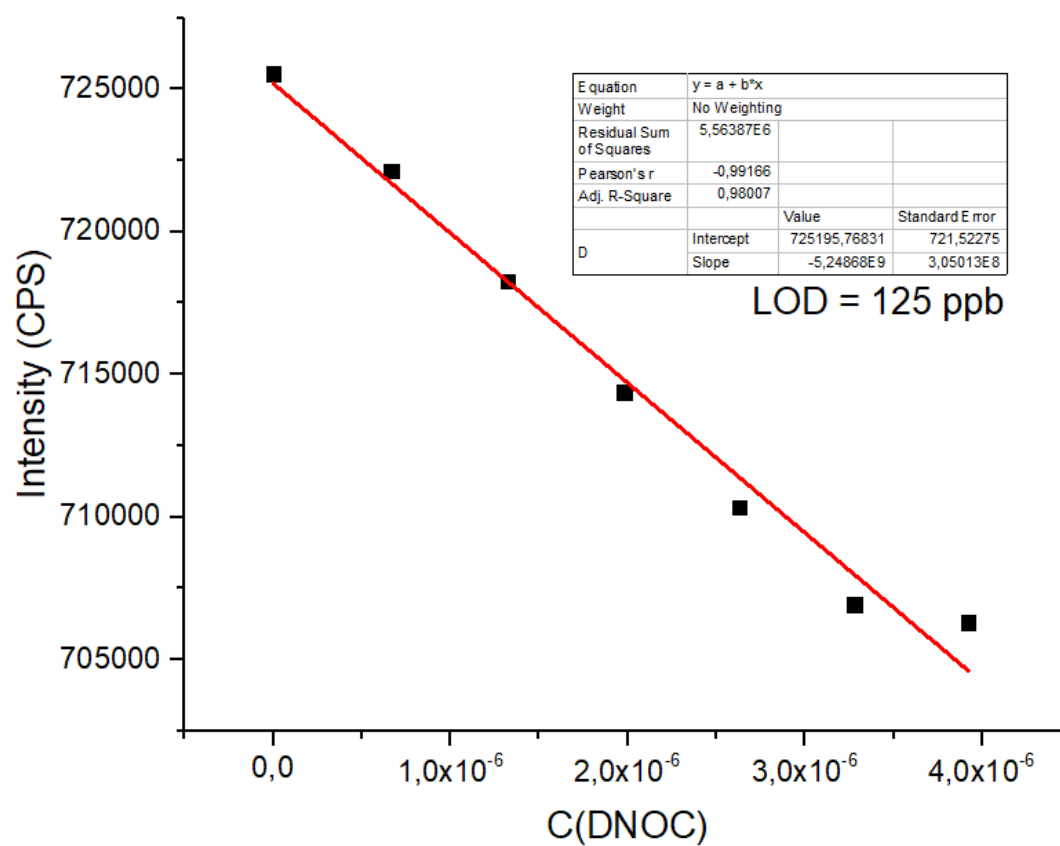

Figure S41. Limit of detection (LOD) plot for compound **3b** in the presence of DNOC. Sample preparation:  $C(\mathbf{3b}) = 3 \cdot 10^{-6}$  M,  $\lambda_{em} = 470$  nm



#### 4. DFT calculations

Table S3. Calculated energy of HOMO/LUMO (HOMO-1/LUMO+1), energy gaps and dipole moments of **3a**, **b**, TNT, DNT, TNP, DNOC based on B3LYP/6-311G\* functional (gas phase)

|                          | <b>3a</b> | <b>3b</b> | <b>TNT</b> | <b>DNT</b> | <b>TNP</b> | <b>DNOC</b> |
|--------------------------|-----------|-----------|------------|------------|------------|-------------|
| $E_{\text{LUMO}+1}$ (eV) | -1,96494  | -2,03269  | -3,75844   | -3,18455   | -3,78456   | -3,08686    |
| $E_{\text{LUMO}}$ (eV)   | -2,89557  | -2,91298  | -3,91382   | -3,39625   | -4,31464   | -3,41122    |
| $E_{\text{HOMO}}$ (eV)   | -6,26053  | -6,04882  | -8,83962   | -8,43771   | -8,61731   | -7,7128     |
| $E_{\text{HOMO}-1}$ (eV) | -7,22871  | -6,77945  | -8,96643   | -8,47363   | -9,11119   | -8,36805    |
| $\Delta E_{0-0}$ (eV)    | 3,36496   | 3,13584   | 4,92581    | 5,04146    | 4,30267    | 4,30158     |
| $\mu$ (D)                | 2,37183   | 3,15009   | 1,67874    | 5,24597    | 1,62381    | 5,27665     |

Table S4. Mulliken population analysis for compounds **3a**,**b**

| <b>3a</b> |   | <b>3b</b> |      |          |
|-----------|---|-----------|------|----------|
| 1         | C | 0,11836   | 1 C  | 0,240702 |
| 2         | C | 0,18727   | 2 C  | 0,000555 |
| 3         | C | 1,19431   | 3 C  | 0,142453 |
| 4         | C | -0,32877  | 4 C  | 0,000554 |
| 5         | C | -0,81228  | 5 C  | -0,38997 |
| 6         | C | 0,88242   | 6 C  | 0,902025 |
| 7         | C | 1,04281   | 7 C  | 0,786385 |
| 8         | C | -1,0733   | 8 C  | -0,71895 |
| 9         | C | -1,33585  | 9 C  | -0,67304 |
| 10        | C | -0,25753  | 10 C | -0,67304 |
| 11        | C | 0,37942   | 11 C | 0,786385 |
| 12        | C | -0,52038  | 12 C | -0,71895 |
| 13        | C | -0,77422  | 13 C | -0,38997 |
| 14        | H | 0,14034   | 17 C | 0,184405 |
| 15        | H | 0,13272   | 18 C | 0,405328 |
| 16        | H | 0,1399    | 19 S | -0,21041 |
| 17        | H | 0,12039   | 20 C | -0,29426 |
| 18        | C | 0,37407   | 22 C | 0,134119 |
| 19        | C | 0,18603   | 27 N | -0,08454 |
| 20        | S | -0,14005  | 28 N | -0,08454 |
| 21        | C | -0,39416  | 29 N | 0,435592 |
| 22        | H | 0,13991   | 30 C | 0,184403 |
| 23        | C | -0,06297  | 31 C | 0,405326 |
| 24        | H | 0,13302   | 32 S | -0,21041 |
| 25        | H | 0,16184   | 33 C | -0,29426 |
| 26        | H | 0,15846   | 35 C | 0,134119 |
| 27        | H | 0,13835   |      |          |
| 28        | N | -0,0651   |      |          |
| 29        | N | -0,0718   |      |          |
| 30        | N | 0,20679   |      |          |

Table S5. Mulliken population analysis for nitroaromatics

| TNT |   |          | DNT |   |          | TNP |   |          | DNOC |   |          |
|-----|---|----------|-----|---|----------|-----|---|----------|------|---|----------|
| 1   | C | -0,36182 | 1   | C | -1,30971 | 1   | C | 0,679784 | 1    | C | -1,96219 |
| 2   | C | 1,163007 | 2   | C | 1,986392 | 2   | C | -0,90973 | 2    | C | 2,563448 |
| 3   | C | -0,30904 | 3   | C | 0,37256  | 3   | C | -0,28179 | 3    | C | 0,427872 |
| 4   | C | -0,36167 | 4   | C | -1,55838 | 4   | C | 0,311785 | 4    | C | -1,79109 |
| 5   | C | -0,30914 | 5   | C | 0,360889 | 5   | C | -0,06581 | 5    | C | 0,723928 |
| 6   | C | 0,250287 | 6   | C | -0,21282 | 6   | C | 0,358547 | 6    | C | -0,39714 |
| 7   | H | 0,196867 | 7   | H | 0,17157  | 7   | H | 0,207142 | 7    | H | 0,188766 |
| 8   | N | -0,25866 | 8   | N | -0,24888 | 8   | N | -0,27643 | 8    | N | -0,24871 |
| 9   | O | 0,024431 | 9   | O | 0,004667 | 9   | O | 0,029623 | 9    | O | 0,021042 |
| 10  | O | 0,024437 | 10  | O | 0,016608 | 10  | O | 0,025616 | 10   | O | 0,001125 |
| 11  | N | -0,22672 | 11  | N | -0,24443 | 11  | N | -0,29048 | 11   | N | -0,24738 |
| 12  | O | 0,030399 | 12  | O | 0,009705 | 12  | O | -0,02744 | 12   | O | 0,024565 |
| 13  | O | 0,048047 | 13  | O | 0,02946  | 13  | O | 0,068209 | 13   | O | 0,039005 |
| 14  | N | -0,22674 | 14  | C | -0,23283 | 14  | N | -0,24793 | 14   | C | -0,0631  |
| 15  | O | 0,030378 | 15  | H | 0,143492 | 15  | O | 0,054393 | 15   | H | 0,163392 |
| 16  | O | 0,048026 | 16  | H | 0,172333 | 16  | O | 0,026797 | 16   | H | 0,16635  |
| 17  | C | -0,51143 | 17  | H | 0,199797 | 17  | H | 0,200993 | 17   | H | 0,197735 |
| 18  | H | 0,165666 | 18  | H | 0,197472 | 18  | O | -0,1639  | 18   | H | 0,151161 |
| 19  | H | 0,165671 | 19  | H | 0,1421   | 19  | H | 0,300615 | 19   | O | -0,22617 |
| 20  | H | 0,221127 |     |   |          |     |   |          | 20   | H | 0,267384 |
| 21  | H | 0,196878 |     |   |          |     |   |          |      |   |          |

## 5. Molecular orbitals images

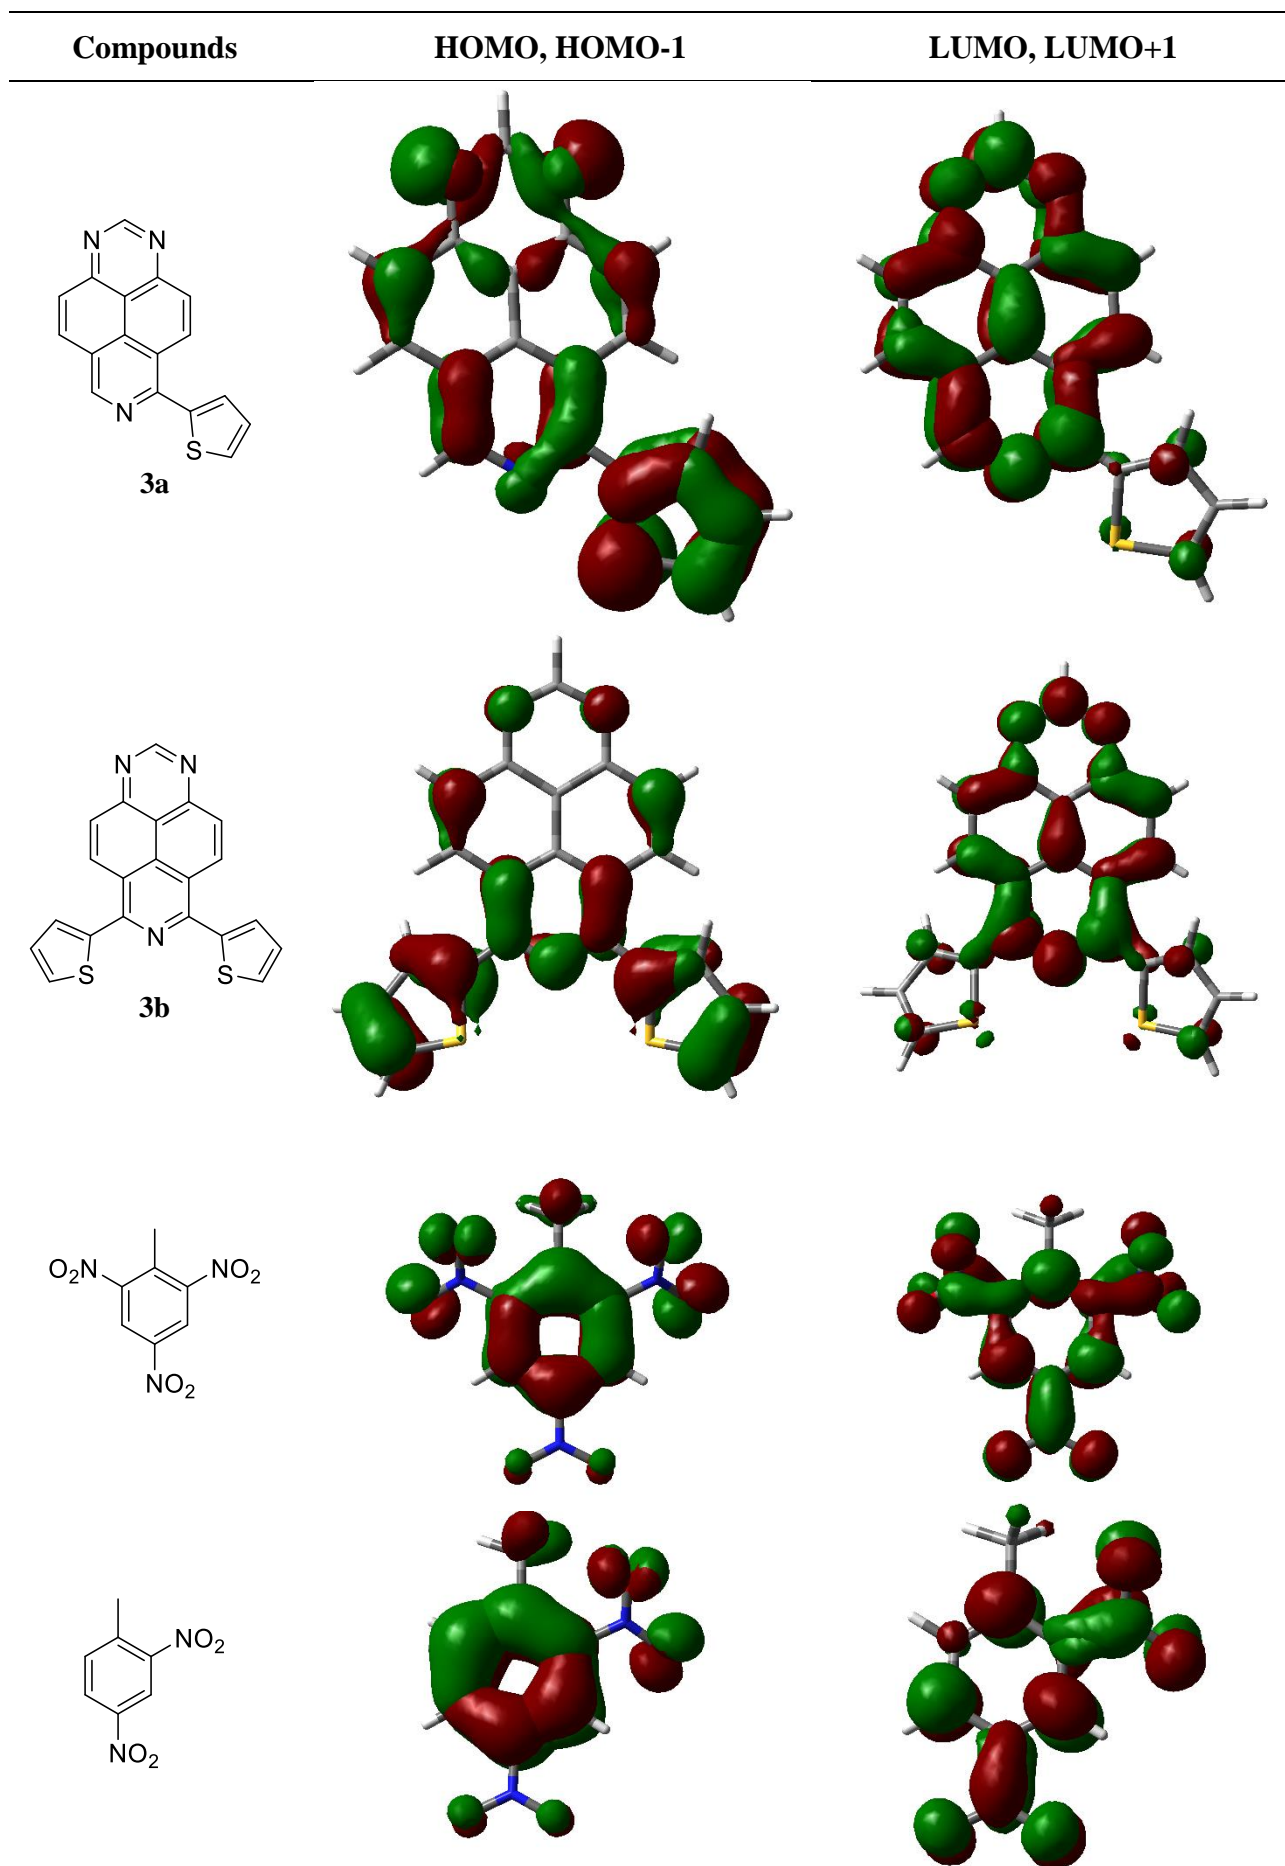

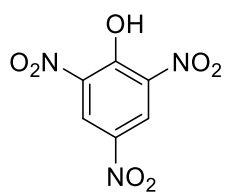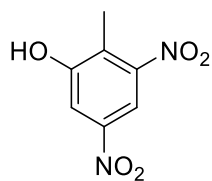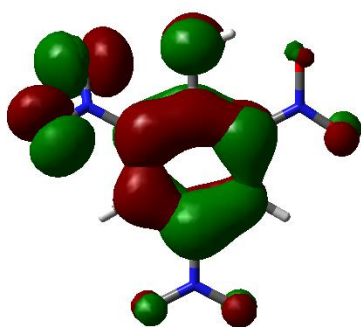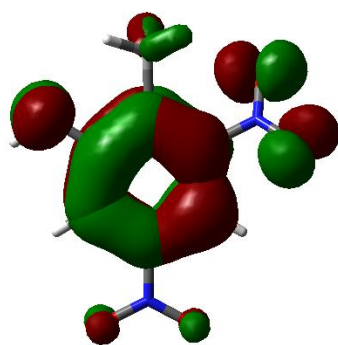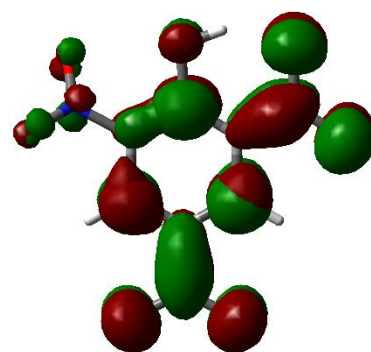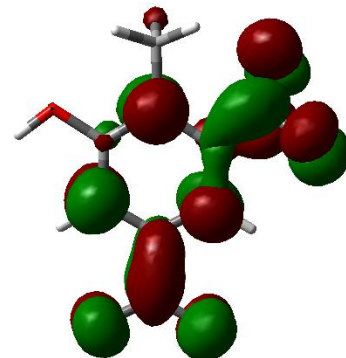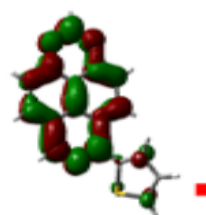

LUMO

-2.90

$\Delta E = 3.36$

HOMO

-6.26

Sensor 3a

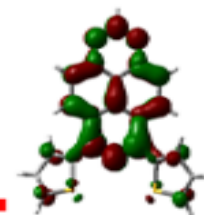

-2.91

$\Delta E = 3.14$

-6.05

Sensor 3b

Figure S42. DFT calculated of energy gaps for sensors **3a,b**

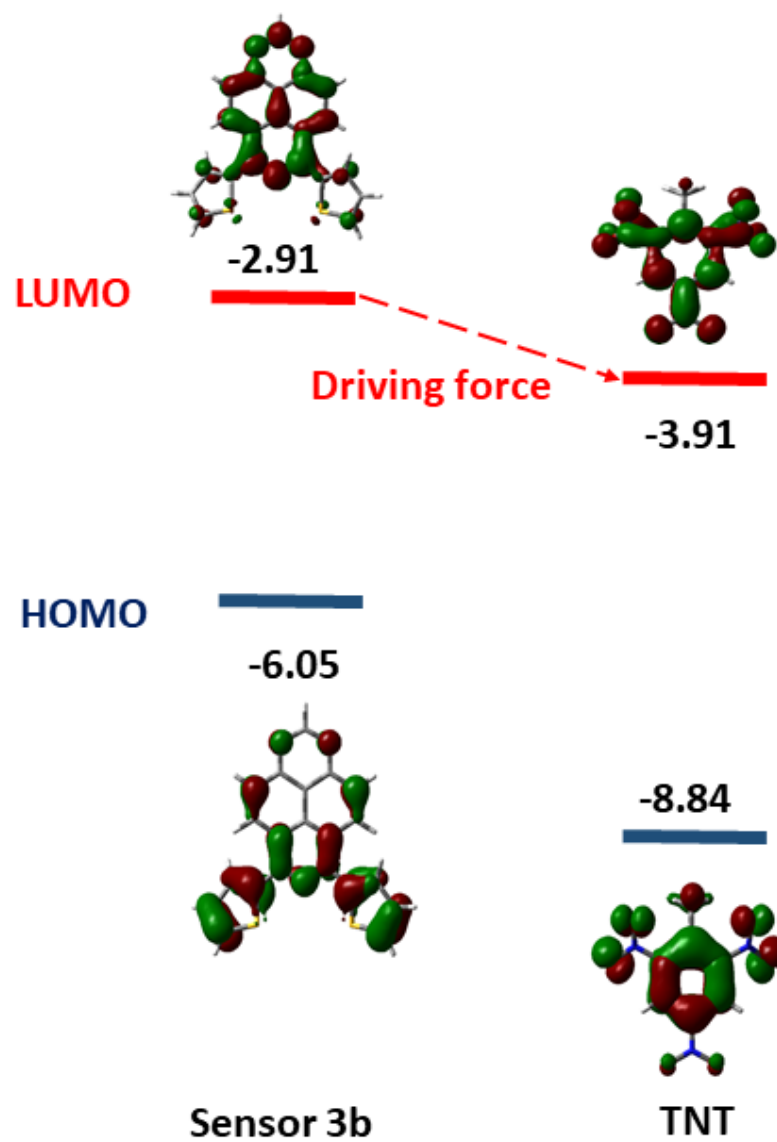

Figure S43. DFT calculated energy of HOMO/LUMO of sensors **3a, b**

## 6. The molecular electronic potential diagrams

| Compounds                                                                                                                         | The molecular electronic potential diagrams                                         | The molecular electronic potential diagrams                                           |
|-----------------------------------------------------------------------------------------------------------------------------------|-------------------------------------------------------------------------------------|---------------------------------------------------------------------------------------|
| 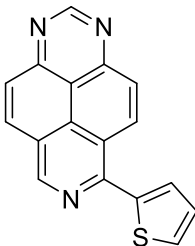 <p data-bbox="336 613 373 645"><b>3a</b></p>    |    |    |
|  <p data-bbox="336 1106 373 1137"><b>3b</b></p> |  |   |
|                                                |  |  |

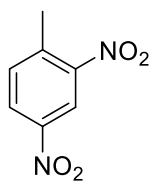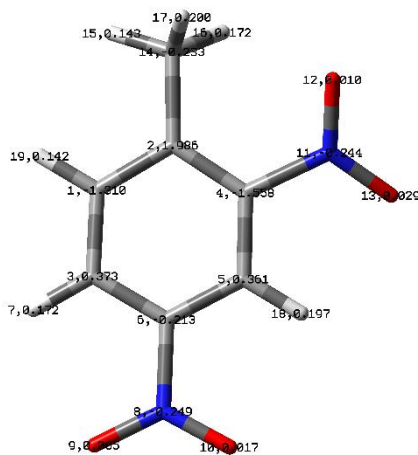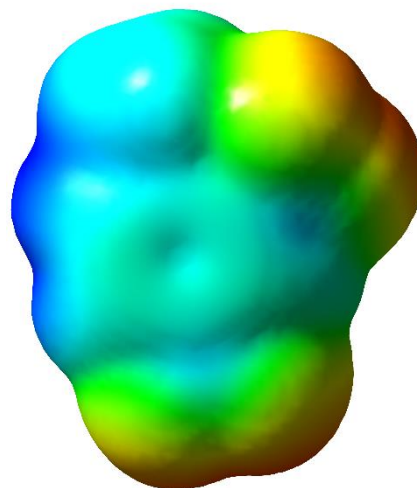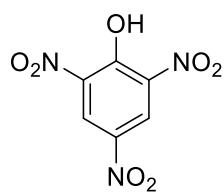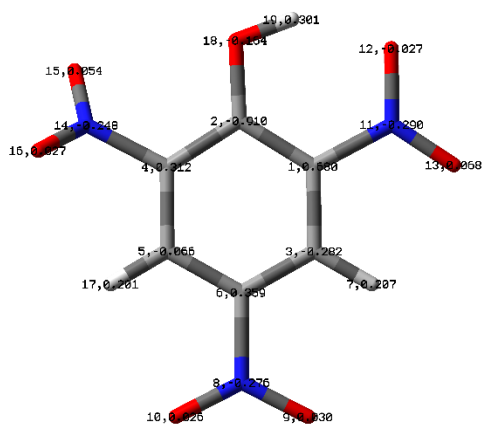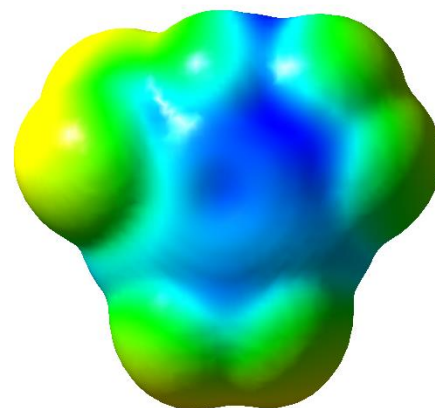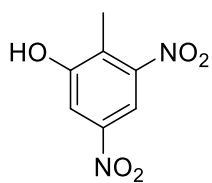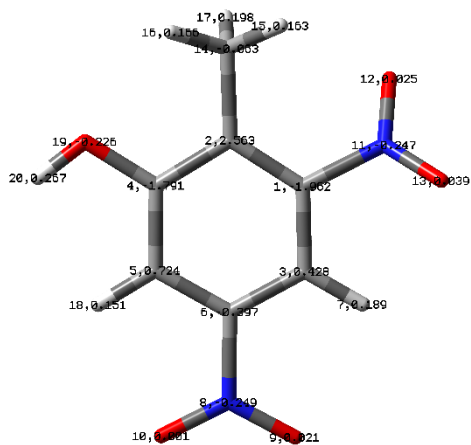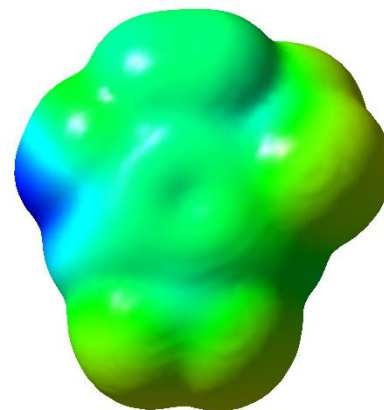

## References

1. D. Genovese, M. Cingolani, E. Rampazzo, L. Prodi, N. Zaccheroni, *Chem. Soc. Rev.*, 2021, **50**, 8414-8427.
